# Supplementary material for: Defensive symbioses of animals with prokaryotic and eukaryotic microorganisms
Source: Royal Society of Chemistry journal article supplement (doi:10.1039/c5np00010f), 2015-01-01
Supplement: c5np00010f1.pdf [file c5np00010f1.pdf]

**Table S1:** Defensive microbial symbionts in animals. Associations involving eukaryotic symbionts are highlighted with grey background.

| Host phylum | Host taxon                                                                                | Environment | Protected life stage of the host | Symbiont taxon                            | Symbiont localization      | Means of defense                | Chemistry of defense                                                                                                                                         | Biosynthesis                    | Antagonist against which the defense is active                                                                                        | Evidence for defensive symbiosis                                                                                                                                                                                                                                  | References |
|-------------|-------------------------------------------------------------------------------------------|-------------|----------------------------------|-------------------------------------------|----------------------------|---------------------------------|--------------------------------------------------------------------------------------------------------------------------------------------------------------|---------------------------------|---------------------------------------------------------------------------------------------------------------------------------------|-------------------------------------------------------------------------------------------------------------------------------------------------------------------------------------------------------------------------------------------------------------------|------------|
| Porifera    | <i>Halichondria okadai</i>                                                                | Marine      | Adult                            | <i>Alteromonas</i> sp.                    | Unknown                    | Secondary metabolite production | Ubiquinones                                                                                                                                                  | Terpenoid                       | Predatory barnacles, e.g. <i>Balanus amphitrite</i>                                                                                   | <i>In vitro</i> settlement inhibition of isolated compounds                                                                                                                                                                                                       | 1          |
| Porifera    | <i>Lissodendoryx isodictyalis</i>                                                         | Marine      | Adult                            | <i>Winogradskyella poriferum</i>          | Unknown                    | Secondary metabolite production | Polyether                                                                                                                                                    | Other                           | Biofilm forming bacteria that attract barnacle larvae, predatory barnacles, e.g. <i>Balanus amphitrite</i> & <i>Hydroides elegans</i> | <i>In vitro</i> settlement inhibition of crude extracts and isolated compounds, <i>in vitro</i> antibacterial activity of isolated cultures, <i>in vitro</i> inhibition of bacterial biofilm formation                                                            | 2, 3       |
| Porifera    | <i>Reniera japonica</i>                                                                   | Marine      | Adult                            | <i>Flexibacter</i> sp.                    | Unknown                    | Radical protection              | 3R,3'R-zeaxanthine                                                                                                                                           | Terpenoid                       | Singlet oxygen, free radicals                                                                                                         | <i>In vitro</i> production of zeaxanthine                                                                                                                                                                                                                         | 4          |
| Porifera    | <i>Dysidea herbacea</i>                                                                   | Marine      | Adult                            | <i>Oscillatoria spongelliae</i>           | Extracellular endosymbiont | Secondary metabolite production | Polychlorinated diketopiperazines, e.g. Herbadysolide, Dihydrodysamide C, Demethyl-dihydrodysamide C, 13-Demethylisodyside nin, Didechlorodihydro dysamide C | Other                           | Fish predators                                                                                                                        | Isolated compounds deter predatory fish in feeding assays with spiked food.                                                                                                                                                                                       | 5-7        |
| Porifera    | <i>Dysidea herbacea</i> , <i>Lendenfeldia chondrodes</i> , <i>Phyllospongia papyracea</i> | Marine      | Adult                            | <i>Oscillatoria spongelliae</i>           | Extracellular endosymbiont | Secondary metabolite production | Polybrominated biphenylethers                                                                                                                                | Other                           | Fish predators, bacteria                                                                                                              | Deter predatory fish in feeding assays with spiked food. <i>In vitro</i> antibacterial activity of extracted compounds                                                                                                                                            | 7-9        |
| Porifera    | <i>Dysidea herbacea</i> , <i>Lamellodysidea herbacea</i>                                  | Marine      | Adult                            | <i>Oscillatoria spongelliae</i>           | Extracellular endosymbiont | Secondary metabolite production | dysidin, dysidenin, neodysidenin & related compounds                                                                                                         | NRPS-PKS                        | Unknown                                                                                                                               | Phospholipase inhibition (-> microbial community regulation through immune system modulation?)                                                                                                                                                                    | 10-14      |
| Porifera    | <i>Dysidea herbacea</i>                                                                   | Marine      | Adult                            | <i>Synechocystis</i> sp.                  | Extracellular endosymbiont | Secondary metabolite production | Dysiherbaine                                                                                                                                                 | Other                           | Unknown                                                                                                                               | <i>In vitro</i> neurotoxic activity of extracted compounds                                                                                                                                                                                                        | 15, 16     |
| Porifera    | <i>Pseudoceratina clavata</i>                                                             | Marine      | Adult                            | <i>Salinispora</i> sp.                    | Unknown                    | Secondary metabolite production | Rifamycin B & SV                                                                                                                                             | PKS                             | Bacteria                                                                                                                              | <i>In vitro</i> antibacterial activity of isolated cultures, Rifamycins are known antibiotics against Gram-positive bacteria                                                                                                                                      | 17, 18     |
| Porifera    | <i>Plakortis simplex</i>                                                                  | Marine      | Adult                            | <i>Sphingomonas</i> sp.                   | Extracellular endosymbiont | Secondary metabolite production | Plakortins, Plakosides, Simplexides, Crasserides, Bacteriohopanoids                                                                                          | PKS<br>Other<br>Other terpenoid | bacteria, fish predators (e.g. <i>Carassius aurata</i> )                                                                              | <i>In vitro</i> compound production by bacterial isolate<br><i>In vitro</i> antimicrobial & cytotoxic (antimalarial) activity,<br><i>In vitro</i> immunosuppressive activity,<br><i>In vitro</i> immunosuppressive activity,<br><i>In vitro</i> feeding deterrent | 19-27      |
| Porifera    | <i>Psammocinia</i> aff. <i>bulbosa</i>                                                    | Marine      | Adult                            | Unknown                                   | Unknown                    | Secondary metabolite production | Psymbirin (=ircinastatin)                                                                                                                                    | <i>trans</i> AT PKS             | Unknown                                                                                                                               | <i>In vitro</i> cytotoxic activity of extracted compound                                                                                                                                                                                                          | 28, 29     |
| Porifera    | <i>Mycale hentscheli</i>                                                                  | Marine      | Adult                            | Unknown                                   | Unknown                    | Secondary metabolite production | Mycalamide A                                                                                                                                                 | <i>trans</i> AT PKS             | Unknown                                                                                                                               | <i>In vitro</i> cytotoxic (antimalarial) activity of extracted compound                                                                                                                                                                                           | 29-31      |
| Porifera    | <i>Theonella swinhoei</i>                                                                 | Marine      | Adult                            | Unicellular heterotrophic bacteria        | Extracellular endosymbiont | Secondary metabolite production | Swinholide A                                                                                                                                                 | <i>trans</i> AT PKS             | Unknown                                                                                                                               | <i>In vitro</i> cytotoxic activity of extracted compound                                                                                                                                                                                                          | 32, 33     |
| Porifera    | <i>Theonella swinhoei</i>                                                                 | Marine      | Adult                            | <i>Candidatus Enttheonella palauensis</i> | Extracellular endosymbiont | Secondary metabolite production | Theopalauamide, Theonellamide A                                                                                                                              | (NRPS?)                         | Unknown                                                                                                                               | <i>In vitro</i> antimycotic activity of extracted compound                                                                                                                                                                                                        | 33-37      |
| Porifera    | <i>Theonella swinhoei</i>                                                                 | Marine      | Adult                            | <i>Candidatus Enttheonella</i> sp.        | Extracellular endosymbiont | Secondary metabolite production | Polytheonamides<br>Onnamides<br>Pseudoonamide A<br>Keramamides<br>Nazuamide A<br>Cyclotheonamide                                                             | Ribosomal<br>NRPS-PKS           | Unknown                                                                                                                               | <i>In vitro</i> antimycotic, antiviral and cytotoxic activity of some of the extracted compounds                                                                                                                                                                  | 38-44      |

|                    |                                                                                                                                                               |        |                                             |                                                    |                                             |                                             |                                                                     |                    |                                      |                                                                                                                                                                                                                                             |                   |  |
|--------------------|---------------------------------------------------------------------------------------------------------------------------------------------------------------|--------|---------------------------------------------|----------------------------------------------------|---------------------------------------------|---------------------------------------------|---------------------------------------------------------------------|--------------------|--------------------------------------|---------------------------------------------------------------------------------------------------------------------------------------------------------------------------------------------------------------------------------------------|-------------------|--|
|                    |                                                                                                                                                               |        |                                             |                                                    |                                             |                                             | A Theopederins                                                      |                    |                                      |                                                                                                                                                                                                                                             |                   |  |
| Porifera           | <i>Discoderma calyx</i>                                                                                                                                       | Marine | Adult                                       | <i>Candidatus Entotheonella</i> sp?                | Extracellular endosymbiont                  | Secondary metabolite production             | Calyxamides A&B                                                     | (NRPS?)            | Unknown                              | <i>In vitro</i> cytotoxic activity of extracted compound                                                                                                                                                                                    | 45                |  |
| Porifera           | <i>Discoderma calyx</i>                                                                                                                                       | Marine | Adult                                       | <i>Candidatus Entotheonella</i> sp?                | Extracellular endosymbiont                  | Secondary metabolite production             | Calyculins                                                          | NRPS-PKS           | Unknown                              | <i>In vitro</i> cytotoxic activity of extracted compound                                                                                                                                                                                    | 46                |  |
| Cnidaria: Anthozoa | <i>Pseudopterogorgia</i> spp. ( <i>P. elisabethae</i> and <i>P. bipinnata</i> )                                                                               | Marine | Mostly Adults                               | Dinoflagellates: <i>Symbiodinium</i> spp.          | Intracellular endosymbiont                  | Secondary metabolite production             | Pseudopteropsins, and kallolide family of diterpenes                | Terpenes           | <i>Thalassoma bifasciatum</i> (fish) | Localization of compounds in symbiont cell fraction; labeling experiments; coral extracts unpalatable to fish predators                                                                                                                     | 47-49             |  |
| Cnidaria: Anthozoa | <i>Pseudopterogorgia americana</i>                                                                                                                            | Marine | Adults                                      | Dinoflagellates?                                   | Intracellular endosymbiont                  | Production of precursors of toxic compounds | Secosterols, including 9,11-secogorgosterol and 9,11-secodinosterol | Sterols            | <i>Thalassoma bifasciatum</i> (fish) | Isolated dinoflagellates from several marine organisms produce gorgosterol and dinosterol; deterrence of secosterols to fish predator                                                                                                       | 50-52             |  |
| Cnidaria: Anthozoa | unspecified soft coral                                                                                                                                        | Marine | Adult?                                      | Actinobacteria: <i>Micromonospora</i> sp. ACM2-092 | Unknown                                     | Secondary metabolite production             | Thiocoraline                                                        | Other              | Antimicrobial and cytotoxic activity | <i>In vitro</i> bioactivity of compounds                                                                                                                                                                                                    | 53                |  |
| Cnidaria: Hydrozoa | <i>Hydra vulgaris</i>                                                                                                                                         | Limnic | Adults                                      | Complex community; mostly Beta-Proteobacteria      | Ectosymbiont and extracellular endosymbiont | Unknown                                     | Unknown                                                             | Unknown            | Fungal pathogens                     | Experimental manipulation of microbiota affects protection against a fungal pathogen; some <i>in vitro</i> antifungal effects by individual bacterial isolates                                                                              | 54                |  |
| Bryozoa            | <i>Bugula neritina</i> , <i>B. simplex</i>                                                                                                                    | Marine | Mostly larvae and Adult reproductive tissue | Gamma-Prot.: 'Candidatus Endobugula sertula'       | Extracellular endosymbiont                  | Secondary metabolite production             | Bryostatins 1-20                                                    | Trans-AT PKS       | Multiple predators                   | Co-localization of bryostatins and symbionts <i>in vivo</i> ; decrease in bryostatin concentrations after antibiotic treatment; identification of bryostatin biosynthesis gene cluster; deterrence of bryostatins against various predators | 55-67             |  |
| Bryozoa            | <i>Sessibugula translucens</i> , <i>Bugula dentata</i>                                                                                                        | Marine | Adult                                       | <i>Pseudoalteromonas tunicata</i>                  | Extracellular endosymbiont                  | Secondary metabolite production             | Tambjamins                                                          | Other              | Fish predators                       | Tambjamins isolated from bryozoans; deterrence against fish predators; identification of tambjamine biosynthesis gene cluster in <i>Pseudoalteromonas tunicata</i> ; isolation of <i>P. tunicata</i> from some bryozoans                    | 67-72             |  |
| Bryozoa            | <i>Amathia</i> spp.                                                                                                                                           | Marine | Adult                                       | Unidentified                                       | Unknown                                     | Secondary metabolite production             | convolutamines, convolutindole                                      | Other              | Parasitic nematodes?                 | Intraspecific variability in bryozoans chemistry; structure of some of the compounds related to microbial metabolites; <i>in vitro</i> nematocidal activity                                                                                 | 73                |  |
| Bryozoa            | <i>Amathia</i> spp.                                                                                                                                           | Marine | Adult                                       | Rod-shaped bacterium                               | Ectosymbiont                                | Secondary metabolite production             | Amathamides and related compounds                                   | Other              | Unknown                              | Localization of amathamides correlated with bacteria                                                                                                                                                                                        | 64, 74-76         |  |
| Bryozoa            | <i>Biflustra perfragilis</i>                                                                                                                                  | Marine | Adult                                       | Unknown                                            | Unknown                                     | Secondary metabolite production             | Perfragilins                                                        | Other              | Unknown                              | Similarity to microbial metabolites; <i>in vitro</i> cytotoxic activity                                                                                                                                                                     | 77                |  |
| Bryozoa            | <i>Flustra foliacea</i>                                                                                                                                       | Marine | Adult                                       | Unknown                                            | Unknown                                     | Secondary metabolite production             | brominated indoles and diterpenoids                                 | Other and terpenes | Unknown                              | Intraspecific variation in chemical composition of <i>F. foliacea</i>                                                                                                                                                                       | 78, 79            |  |
| Bryozoa            | <i>Phidolopora pacifica</i> , <i>Diaperoecia californica</i> , <i>Heteropora alaskensis</i> , <i>Tricellaria ternata</i> , and <i>Hippodiplosia insculpta</i> | Marine | Adult                                       | Unknown                                            | Unknown                                     | Secondary metabolite production             | phidolopins and other nitrophenols                                  | Other              | Fouling organisms                    | Occurrence in taxonomically diverse sympatric bryozoans; <i>in vitro</i> activity of compounds                                                                                                                                              | 80                |  |
| Tunicata           | <i>Atapozoa</i> sp. (= <i>Sigillina signifera</i> )                                                                                                           | Marine | Adult                                       | <i>Pseudoalteromonas tunicata</i>                  | Extracellular endosymbiont                  | Secondary metabolite production             | Tambjamins                                                          | Other              | Fish predators                       | Tambjamins isolated from <i>Atapozoa</i> sp.; deterrence against fish predators; identification of tambjamine biosynthesis gene cluster in <i>Pseudoalteromonas tunicata</i> ; isolation of <i>P. tunicata</i> from some tunicates          | 67, 70-72, 81, 82 |  |
| Tunicata           | <i>Trididemnum solidum</i> , <i>Aplidium albicans</i>                                                                                                         | Marine | Larvae                                      | Cyanobacteria: <i>Synechocystis trididemni</i>     | Ectosymbiont                                | Secondary metabolite production             | Didemnins                                                           | NRPS/PKS           | Fish predators                       | Didemnin B found in two phylogenetically distant ascidians; plasmid-localized didemnin gene cluster in a marine Alpha-Proteobacteria; deterrent activity against predatory fish                                                             | 83-90             |  |
| Tunicata           | <i>Lissoclinum patella</i>                                                                                                                                    | Marine | Adult                                       | Cyanobacteria: <i>Prochloron didemni</i>           | Ectosymbiont                                | Secondary metabolite production             | Cyanobactins (Patellamides, Trunkamide, Patellins, and others)      | Ribosomal          | Unknown                              | Co-occurrence of cyanobactins and <i>Prochloron</i> symbionts; cyanobactin gene clusters identified in symbiotic and free-living cyanobacteria; <i>in vitro</i> cytotoxicity                                                                | 87, 91-97         |  |
| Tunicata           | <i>Lissoclinum patella</i>                                                                                                                                    | Marine | Adult                                       | Alpha-Prot.:                                       | Intracellular                               | Secondary                                   | Patellazoles                                                        | Trans-AT PKS       | Unknown                              | Inconsistent occurrence across <i>L. patella</i> individuals; metagenomic                                                                                                                                                                   | 98-102            |  |

|                            |                                                               |        |         |                                                                                                                                                             |                               |                                 |                                      |                           |                                                |                                                                                                                                                                                                       |                 |
|----------------------------|---------------------------------------------------------------|--------|---------|-------------------------------------------------------------------------------------------------------------------------------------------------------------|-------------------------------|---------------------------------|--------------------------------------|---------------------------|------------------------------------------------|-------------------------------------------------------------------------------------------------------------------------------------------------------------------------------------------------------|-----------------|
|                            |                                                               |        |         | ' <i>Candidatus</i> Endolissoclinum faulkneri                                                                                                               | endosymbiont                  | metabolite production           |                                      |                           |                                                | and genomic analyses and identification of the patellazole gene cluster in the otherwise eroded symbiont genome; <i>in vitro</i> cytotoxicity                                                         |                 |
| Tunicata                   | <i>Lissoclinum bistratum</i>                                  | Marine | Adult   | Cyanobacteria: <i>Prochloron didemni</i>                                                                                                                    | Ectosymbiont                  | Secondary metabolite production | Bistramides                          | PKS                       | Unknown                                        | Enrichment of bistramides in <i>Prochloron</i> cell fraction; <i>in vitro</i> cytotoxicity                                                                                                            | 103-106         |
| Tunicata                   | <i>Synoicum adareanum</i>                                     | Marine | Adult   | Unknown bacterium                                                                                                                                           | Unknown                       | Secondary metabolite production | Palmerolides                         | <i>Trans</i> -AT PKS/NRPS | Unknown                                        | Putative bacterial palmerolide PKS fragments sequenced; <i>in vitro</i> cytotoxicity                                                                                                                  | 107             |
| Tunicata                   | <i>Ecteinascidia turbinata</i>                                | Marine | Adult   | ' <i>Candidatus</i> Endoecteinascidia frumentensis'                                                                                                         | Intracellular endosymbiont    | Secondary metabolite production | Ecteinascidin-743                    | NRPS                      | Unknown                                        | Bacterial NRPS cluster likely responsible for ET-743 production assigned to the symbiont genome by analysis of codon usage; <i>in vitro</i> cytotoxicity of ET-743                                    | 108-110         |
| Tunicata                   | <i>Eudistoma toealensis</i>                                   | Marine | Adult   | Possibly actinobacterial associates                                                                                                                         | Unknown                       | Secondary metabolite production | Staurosporines                       | Other                     | Unknown                                        | Production of staurosporines by some terrestrial and marine Actinobacteria ( <i>Streptomyces</i> spp.); presence of Actinobacteria ( <i>Salinispora</i> and <i>Verrucosipora</i> ) in ascidian tissue | 111             |
| Acoelomorpha: Convolutidae | <i>Amphiscolops</i> spp.                                      | Marine | Unknown | Dinoflagellates: <i>Amphidinium</i> spp.                                                                                                                    | Unknown                       | Secondary metabolite production | Amphidinolides A-H                   | PKS                       | Predators?                                     | <i>In vitro</i> production of cytotoxic amphidinolides by isolated dinoflagellates                                                                                                                    | reviewed in 112 |
| Acoelomorpha: Convolutidae | <i>Amphiscolops</i> spp.                                      | Marine | Unknown | Dinoflagellates: <i>Symbiodinium</i> sp.                                                                                                                    | Unknown                       | Secondary metabolite production | Zooxanthellatoxins A and B           | PKS?                      | Unknown                                        | <i>In vitro</i> production of vasoconstrictive zooxanthellatoxins & cytotoxic symbiodinolide by isolated dinoflagellates                                                                              | reviewed in 112 |
| Nemertea                   | <i>Cephalothrix simula</i>                                    | Marine | Adult   | <i>Bacillus</i> sp.                                                                                                                                         | Extracellular(?) endosymbiont | Secondary metabolite production | Tetrodotoxin                         | Unknown                   | Predators                                      | <i>In vitro</i> cytotoxic activity of extracted compound                                                                                                                                              | 113-117         |
| Mollusca, Gastropoda       | <i>Crysmallon squamiferrum</i>                                | Marine | Adult   | α- and β-proteobacteria                                                                                                                                     | Ectosymbiont                  | Mineral armor                   | Pyrite and greigite                  | Other                     | Predators                                      | Hardening of scales                                                                                                                                                                                   | 118-120         |
| Mollusca, Gastropoda       | <i>Conus pulicarius</i> & <i>Conus</i> sp.                    | Marine | Adult   | <i>Streptomyces</i> sp.                                                                                                                                     | Intracellular endosymbiont    | Secondary metabolite production | Aerugine, Pulicatin, Watasemycin     | Other                     | Unknown                                        | <i>In vitro</i> compound production by bacterial isolate<br><i>In vitro</i> antimicrobial<br><i>In vitro</i> anti-inflammatory<br><i>In vitro</i> anti-hypotensive                                    | 121, 122        |
| Mollusca, Gastropoda       | <i>Conus tribblei</i> & <i>Chicoreus nobilis</i>              | Marine | Adult   | <i>Streptomyces</i> sp.                                                                                                                                     | Unknown                       | Secondary metabolite production | Nobilamides                          | (NRPS?)                   | Unknown                                        | <i>In vitro</i> compound production by bacterial isolate<br><i>In vitro</i> anti-inflammatory                                                                                                         | 123             |
| Mollusca, Gastropoda       | <i>Conus circumciscus</i> & <i>Conus</i> sp.                  | Marine | Adult   | <i>Gordonia</i> sp.                                                                                                                                         | Unknown                       | Secondary metabolite production | Circumcins                           | Unknown                   | Unknown                                        | <i>In vitro</i> compound production by bacterial isolate<br><i>In vitro</i> neuroactive                                                                                                               | 124             |
| Mollusca, Gastropoda       | <i>Conus tribblei</i> & <i>Conus rolani</i>                   | Marine | Adult   | <i>Nocardiopsis alba</i>                                                                                                                                    | Unknown                       | Secondary metabolite production | Nocapyrones                          | PKS                       | Unknown                                        | <i>In vitro</i> compound production by bacterial isolate<br>Structurally related compounds are shown to be defensive                                                                                  | 125, 126        |
| Mollusca, Gastropoda       | Teredinidae ("shipworms")                                     | Marine | Adult   | Teredinibacter turnerae                                                                                                                                     | Ectosymbiont                  | Secondary metabolite production | Tartrolons                           | <i>Trans</i> AT PKS       | Bacteria, Boron                                | <i>In vitro</i> antimicrobial activity of isolated compounds, (controlling boron concentration, which is cytotoxic in high levels?)                                                                   | 127-132         |
| Mollusca, Gastropoda       | <i>Lienardia totopotens</i>                                   | Marine | Adult   | <i>Streptomyces</i> sp.                                                                                                                                     | Unknown                       | Secondary metabolite production | Lobophorins                          | PKS                       | Bacteria, Predators(?)                         | <i>In vitro</i> compound production by bacterial isolate<br><i>In vitro</i> antibacterial<br><i>In vitro</i> cytotoxic                                                                                | 133             |
| Mollusca, Cephalopoda      | <i>Hapalochlaena</i> sp.                                      | Marine | Adult   | Variable bacteria                                                                                                                                           | Variable locations            | Secondary metabolite production | Tetrodotoxin                         | Unknown                   | Predators                                      | Extraction and structure elucidation of cytotoxic tetrodotoxin derivatives,<br><i>In vitro</i> production of tetrodotoxin by variable isolates                                                        | 116, 134, 135   |
| Mollusca, Cephalopoda      | <i>Euprymna scolopes</i>                                      | Marine | Adult   | <i>Vibrio fischerii</i>                                                                                                                                     | Ectosymbiont                  | Light emission                  | Luziferase                           | Other                     | Predators and prey                             | Camouflage through counterillumination                                                                                                                                                                | 136-139         |
| Mollusca, Cephalopoda      | <i>Loligo</i> sp., <i>Sepia</i> sp., <i>Euprymna scolopes</i> | Marine | Egg     | α- and β-proteobacteria, <i>Bacteroidetes</i> bacteria (esp. <i>Roseobacter</i> in <i>Loligo</i> and <i>Sepia</i> , <i>Phaeobacter</i> in <i>Euprymna</i> ) | Unknown endosymbiont          | Secondary metabolite production | Unknown                              | Unknown                   | Unknown                                        | <i>In vitro</i> antimicrobial activity of extracts from symbiont populated glands and eggs                                                                                                            | 140-151         |
| Crustacea                  | <i>Palaemon macrodactylus</i>                                 | Marine | Egg     | <i>Alteromonas</i> sp.                                                                                                                                      | Ectosymbiont                  | Secondary metabolite production | 2,3-indolinedione (isatin)           | Other                     | Fungal pathogen: <i>Lagenidium callinectes</i> | Aposymbiotic eggs are susceptible but isolated compound restores protective effect upon application to aposymbiotic eggs                                                                              | 152             |
| Crustacea                  | <i>Homarus americanus</i>                                     | Marine | Egg     | Rod-shaped, Gram-negative bacteria                                                                                                                          | Ectosymbiont                  | Secondary metabolite production | 4-hydroxyphenethyl alcohol (tyrosol) | Other                     | Fungal pathogen: <i>Lagenidium callinectes</i> | <i>In vitro</i> inhibition of <i>L. callinectes</i> growth by extracted compound                                                                                                                      | 153             |

|           |                                                                              |                             |                 |                                                                                      |              |                                 |                                                                                        |          |                                                                                                                         |                                                                                                                 |                    |
|-----------|------------------------------------------------------------------------------|-----------------------------|-----------------|--------------------------------------------------------------------------------------|--------------|---------------------------------|----------------------------------------------------------------------------------------|----------|-------------------------------------------------------------------------------------------------------------------------|-----------------------------------------------------------------------------------------------------------------|--------------------|
| Crustacea | Isopoda: <i>Santia</i> spp.                                                  | Marine                      | Adult           | Cyanobacteria: <i>Synechococcus</i> , <i>Prochlorothrix</i> and <i>Synechocystis</i> | Ectosymbiont | Secondary metabolite production | Unknown                                                                                | Unknown  | Fish predators                                                                                                          | Aposymbiotic isopods are not rejected by fish but methanolic extract from symbiotic animals restores protection | 154                |
| Nematoda  | various <i>Heterorhabditis</i> spp. and <i>Steinernema</i> spp. (Rhabditida) | Terrestrial , within Insect | All life stages | Various <i>Photorhabdus luminescens</i> and <i>Xenorhabdus nematophila</i>           | Ectosymbiont | Secondary metabolite production | Rhabduscin                                                                             | Other    | Potential activity against fungi                                                                                        | Defensive compound elucidated                                                                                   | 155                |
| Nematoda  | various <i>Heterorhabditis</i> spp. (Rhabditida: Heterorhabditidae)          | Terrestrial , within Insect | All life stages | Various <i>Photorhabdus</i> spp.                                                     | Ectosymbiont | Secondary metabolite production | Carbapenem (beta-lactam antibiotic)                                                    | Other    | Activity against distantly related bacteria, yeasts, fungi                                                              | Defensive compound elucidated, <i>in vitro</i> defensive activity                                               | 156-158            |
| Nematoda  | various <i>Heterorhabditis</i> spp. (Rhabditida: Heterorhabditidae)          | Terrestrial , within Insect | All life stages | <i>Photorhabdus luminescens</i>                                                      | Ectosymbiont | Secondary metabolite production | Carbapenem-like molecule                                                               | Other    | Broad-spectrum activity against Gram-negative bacteria                                                                  | Defensive compound elucidated, <i>in vitro</i> defensive activity                                               | 157                |
| Nematoda  | various <i>Heterorhabditis</i> spp. (Rhabditida: Heterorhabditidae)          | Terrestrial , within Insect | All life stages | <i>Photorhabdus luminescens</i>                                                      | Ectosymbiont | Secondary metabolite production | Genistine                                                                              | Other    | Unknown                                                                                                                 | Defensive compound elucidated                                                                                   | 159                |
| Nematoda  | various <i>Heterorhabditis</i> spp. (Rhabditida: Heterorhabditidae)          | Terrestrial , within Insect | All life stages | <i>Photorhabdus luminescens</i> and others                                           | Ectosymbiont | Secondary metabolite production | Isopropylstilbenes (e.g. 3,5-dihydroxy-4-isopropylstilbene)                            | Other    | Activity against Gram-positive and Gram-negative bacteria, fungi, nematodes                                             | Defensive compounds elucidated, <i>in vitro</i> defensive activity                                              | 160-166            |
| Nematoda  | various <i>Heterorhabditis</i> spp. (Rhabditida: Heterorhabditidae)          | Terrestrial , within Insect | All life stages | <i>Photorhabdus luminescens</i>                                                      | Ectosymbiont | Secondary metabolite production | Anthraquinones (red pigments color cadaver) (e.g. 1,3,8-trihydroxy-9,10-anthraquinone) | PKS      | Activity against microorganisms assumed, <sup>167</sup> tested only against <i>E. coli</i>                              | Defensive compounds elucidated                                                                                  | 159, 161, 162, 168 |
| Nematoda  | <i>Heterorhabditis bacteriophora</i> (Rhabditida: Heterorhabditidae)         | Terrestrial , within Insect | All life stages | <i>Photorhabdus luminescens</i>                                                      | Ectosymbiont | Secondary metabolite production | Photobactin                                                                            | Other    | Antibacterial                                                                                                           | Defensive compounds elucidated, <i>in vitro</i> defensive activity                                              | 158                |
| Nematoda  | <i>Heterorhabditis</i> sp. (Rhabditida: Heterorhabditidae)                   | Terrestrial , within Insect | All life stages | <i>Photorhabdus aeruginosa</i>                                                       | Ectosymbiont | Secondary metabolite production | Lumicins                                                                               | Unknown  | Broad-spectrum bacteriocins to outcompete other <i>Photorhabdus</i> spp. and strains as well as other bacteria          | Defensive compounds elucidated, <i>in vitro</i> defensive activity                                              | 169, 170           |
| Nematoda  | various <i>Heterorhabditis</i> spp. (Rhabditida: Heterorhabditidae)          | Terrestrial , within Insect | All life stages | Various <i>Photorhabdus</i> strains                                                  | Ectosymbiont | Secondary metabolite production | Photorhabdins (bacteriophage-related R- and F-type pyocins)                            | Unknown  | Broad-spectrum bacteriocins to outcompete other <i>Photorhabdus</i> spp. and strains as well as other bacteria          | Defensive compounds elucidated, <i>in vitro</i> defensive activity                                              | 169, 171           |
| Nematoda  | various <i>Heterorhabditis</i> spp. (Rhabditida: Heterorhabditidae)          | Terrestrial , within Insect | All life stages | <i>Photorhabdus luminescens</i>                                                      | Ectosymbiont | Secondary metabolite production | Small, extracellular, possibly nonproteinacious compound(s)                            | Unknown  | Ants                                                                                                                    | Defensive compounds elucidated, <i>in vivo</i> fitness benefits                                                 | 172-175            |
| Nematoda  | various <i>Steinernema</i> spp. (Rhabditida : Steinernematidae)              | Terrestrial , within Insect | All life stages | <i>Xenorhabdus budapestensis</i> and <i>X. szentirmaii</i>                           | Ectosymbiont | Secondary metabolite production | Fabclavines (peptide-polyketide-polyamino hybrids)                                     | PKS/NRPS | Broad-spectrum activity against bacteria, yeasts and protozoa                                                           | Defensive compounds elucidated, <i>in vitro</i> defensive activity                                              | 176                |
| Nematoda  | various <i>Steinernema</i> spp. (Rhabditida : Steinernematidae)              | Terrestrial , within Insect | All life stages | <i>Xenorhabdus bovienii</i> and <i>X. nematophilus</i>                               | Ectosymbiont | Secondary metabolite production | Xenorhabdins (dithiopyrrolones; member of pyrothine family)                            | Unknown  | Activity against Gram-positive bacteria, little effect against Gram-negative bacteria, some with activity against fungi | Defensive compounds elucidated, <i>in vitro</i> defensive activity                                              | 156, 162, 177      |
| Nematoda  | various <i>Steinernema</i> spp. (Rhabditida : Steinernematidae)              | Terrestrial , within Insect | All life stages | Various <i>Xenorhabdus</i> spp.                                                      | Ectosymbiont | Secondary metabolite production | Xenorxides (oxidized products of Xenorhabdins)                                         | Unknown  | Broad-spectrum activity against Gram-positive bacteria, yeast, fungi                                                    | Defensive compounds elucidated, <i>in vitro</i> defensive activity                                              | 178                |
| Nematoda  | <i>Steinernema</i> sp. (Rhabditida : Steinernematidae)                       | Terrestrial , within Insect | All life stages | <i>Xenorhabdus</i> sp. PB30.3                                                        | Ectosymbiont | Secondary metabolite production | Xenobactin (hexadepsipeptide )                                                         | (NRPS?)  | Activity against protozoa and Gram-positive bacteria, not effective against Gram-negative bacteria                      | Defensive compounds elucidated, <i>in vitro</i> defensive activity                                              | 179                |

|                     |                                                                                               |                             |                  |                                                                                                                       |                                       |                                                                         |                                                                                               |                                                                          |                                                                                                                           |                                                                                                            |              |
|---------------------|-----------------------------------------------------------------------------------------------|-----------------------------|------------------|-----------------------------------------------------------------------------------------------------------------------|---------------------------------------|-------------------------------------------------------------------------|-----------------------------------------------------------------------------------------------|--------------------------------------------------------------------------|---------------------------------------------------------------------------------------------------------------------------|------------------------------------------------------------------------------------------------------------|--------------|
| Nematoda            | <i>Steinernema carpocapsae</i> (Rhabditida : Steinernematidae)                                | Terrestrial , within Insect | All life stages  | <i>Xenorhabdus nematophilus</i> and others                                                                            | Ectosymbiont                          | Secondary metabolite production                                         | Xenocoumacins (peptide-polyketide origin ; benzopyran-1-one derivatives)                      | NRPS-PKS                                                                 | Activity against Gram-positive bacteria                                                                                   | Defensive compounds elucidated, <i>in vitro</i> defensive activity                                         | 180          |
| Nematoda            | <i>Steinernema carpocapsae</i> (Rhabditida : Steinernematidae)                                | Terrestrial , within Insect | All life stages  | <i>Xenorhabdus nematophilus</i>                                                                                       | Ectosymbiont                          | Secondary metabolite production                                         | Xenematide (cyclodepsipeptide )                                                               | NRPS                                                                     | Antibacterial activity                                                                                                    | Defensive compounds elucidated, <i>in vitro</i> defensive activity                                         | 181, 182     |
| Nematoda            | <i>Steinernema carpocapsae</i> (Rhabditida : Steinernematidae)                                | Terrestrial , within Insect | All life stages  | <i>Xenorhabdus nematophilus</i>                                                                                       | Ectosymbiont                          | Secondary metabolite production                                         | Benzylideneacetone (monoterpenoid)                                                            | Terpenoid                                                                | Specific activity against Gram-negative bacteria                                                                          | Defensive compounds elucidated, <i>in vitro</i> defensive activity                                         | 183          |
| Nematoda            | <i>Steinernema carpocapsae</i> (Rhabditida : Steinernematidae)                                | Terrestrial , within Insect | All life stages  | <i>Xenorhabdus nematophilus</i>                                                                                       | Ectosymbiont                          | Secondary metabolite production                                         | Nematophins (indole derivatives)                                                              | Other                                                                    | Activity against Gram-positive and Gram-negative bacteria as well as a few fungi                                          | Defensive compounds elucidated, <i>in vitro</i> defensive activity                                         | 160, 184     |
| Nematoda            | <i>Steinernema carpocapsae</i> (Rhabditida : Steinernematidae)                                | Terrestrial , within Insect | All life stages  | <i>Xenorhabdus nematophilus</i>                                                                                       | Ectosymbiont                          | Secondary metabolite production                                         | Xenorhabdicins (phage related R-type pyocin)                                                  | Unknown                                                                  | Narrow-spectrum bacteriocins to outcompete <i>Xenorhabdus</i> spp., <i>P. luminescens</i> and sister taxon <i>Proteus</i> | Defensive compounds elucidated, <i>in vitro</i> defensive activity, <i>in vivo</i> fitness benefits        | 169, 185-187 |
| Nematoda            | <i>Steinernema carpocapsae</i> (Rhabditida : Steinernematidae)                                | Terrestrial , within Insect | All life stages  | <i>Xenorhabdus nematophilus</i>                                                                                       | Ectosymbiont                          | Secondary metabolite production                                         | ant-deterent factor (ADF)                                                                     | Unknown                                                                  | Deter ants                                                                                                                | Defensive compounds elucidated, <i>in vivo</i> fitness benefits                                            | 175          |
| Insecta, Blattodea, | Fungus-farming Macrotermitinae                                                                | Terrestrial                 | Fungal cultivars | <i>Termitomyces</i> sp.                                                                                               | Ectosymbiont                          | Secondary metabolite production                                         | Unknown mycocins                                                                              | Unknown                                                                  | Related cultivar species and strains                                                                                      | <i>In vitro</i> defensive activity                                                                         | 188          |
| Insecta, Blattodea  | Fungus-farming termites (Termitidae)                                                          | Terrestrial                 | Fungal cultivars | Various Actinobacteria                                                                                                | Ectosymbiont                          | Secondary metabolite production                                         | Unknown                                                                                       | Unknown                                                                  | Competing fungi ( <i>Pseudoxylaria</i> , <i>Trichoderma</i> )                                                             | <i>In vitro</i> defensive activity                                                                         | 189          |
| Insecta, Blattodea  | Fungus-farming <i>Microtermes</i> sp.                                                         | Terrestrial                 | Fungal cultivars | <i>Streptomyces</i> sp.                                                                                               | Ectosymbiont                          | Secondary metabolite production                                         | Microtermolides A and B                                                                       | PKS-NRPS                                                                 | Unknown                                                                                                                   | Defensive compounds elucidated                                                                             | 190          |
| Insect, Orthoptera  | Locust: <i>Schistocerca gregaria</i>                                                          | Terrestrial                 | Adult            | <i>Pantoea agglomerans</i> (γ-proteobacteria)                                                                         | Ectosymbiont                          | production of bioactive compound                                        | Quinines                                                                                      | Other                                                                    | Pathogenic fungi ( <i>Metarhizium anisopliae</i> )                                                                        | <i>In vivo</i> fitness benefits, <i>in vitro</i> defensive activity and elucidation of defensive compounds | 191-193      |
| Insecta, Hemiptera  | Whitefly: <i>Bemisia tabaci</i>                                                               | Terrestrial                 | Adult            | <i>Rickettsia</i> sp.                                                                                                 | Intra- and extracellular endosymbiont | Unknown                                                                 | Unknown                                                                                       | Unknown                                                                  | Bacterial pathogen ( <i>Pseudomonas syringae</i> )                                                                        | <i>In vivo</i> fitness benefits in laboratory conditions                                                   | 194          |
| Insecta, Hemiptera  | Aphid: <i>Myzus persicae</i> (Aphididae)                                                      | Terrestrial                 | Nymph and Adult  | <i>Regiella insecticola</i> (γ-proteobacteria)                                                                        | Intra- and extracellular endosymbiont | Unknown                                                                 | Unknown                                                                                       | Unknown                                                                  | Parasitoid wasp ( <i>Aphidius colemani</i> )                                                                              | <i>In vivo</i> fitness benefits                                                                            | 195          |
| Insecta, Hemiptera  | Aphids: <i>Acyrtosipon pisum</i> , <i>Aphis craccivora</i> and <i>Aphis fabae</i> (Aphididae) | Terrestrial                 | Nymph and Adult  | <i>Hamiltonella defensa</i> (γ-proteobacteria)<br><br>(APSE bacteriophage encoded genes)                              | Intra- and extracellular endosymbiont | production of bioactive compound, and possibly complementary mechanisms | Shiga-like toxin, cytolethal distending toxin, and YD-repeat toxins (possibly others as well) | (Ribosomal peptide?)<br>(Ribosomal peptide?)<br><br>(Ribosomal peptide?) | Parasitoid wasps ( <i>Aphidius ervi</i> , <i>Aphidius eadyi</i> , <i>Lysiphlebus fabarum</i> )                            | <i>In vivo</i> fitness benefits                                                                            | 196-202      |
| Insecta; Hemiptera  | Pea aphid: <i>Acyrtosipon pisum</i> (Aphididae)                                               | Terrestrial                 | Adult            | <i>Regiella insecticola</i> , <i>Rickettsiella</i> sp. (γ-proteobacteria)<br><i>Rickettsia</i> sp. (α-proteobacteria) | Intra- and extracellular endosymbiont | Unknown                                                                 | Unknown                                                                                       | Unknown                                                                  | Fungal pathogen ( <i>Pandora neoaphidis</i> )                                                                             | <i>In vivo</i> fitness benefits                                                                            | 203-205      |
| Insecta, Hemiptera  | Asian citrus psyllid: <i>Diaphorina citri</i> (Psyllidae)                                     | Terrestrial                 | Adult            | <i>Candidatus Proffittella armatura</i> (β-proteobacteria)                                                            | Intracellular endosymbiont            | production of bioactive compound                                        | Diaphorin (polyketide)                                                                        | <i>trans</i> -AT PKS                                                     | Unknown                                                                                                                   | Defensive compound elucidated and present in 100% of individuals at potentially cytotoxic concentrations   | 206          |
| Insecta, Hemiptera  | Red gum lerp psyllid: <i>Glycaspis brimblecombei</i> (Psyllidae)                              | Terrestrial                 | Adult            | <i>Arsenophonus</i> sp.                                                                                               | Intracellular endosymbiont            | Unknown (proposed: phage-mediated)                                      | Unknown                                                                                       | -                                                                        | Parasitoids                                                                                                               | Positive correlation between presence of symbiont and natural enemy in the field                           | 207          |
| Insecta, Coleoptera | Some <i>Euops</i> Leaf-rolling weevils (Attelabidae)                                          | Terrestrial                 | Larva, Pupa      | <i>Penicillium herquei</i>                                                                                            | Ectosymbiont                          | Secondary metabolite production                                         | Scleroderolide                                                                                | PKS                                                                      | Fungal and bacterial pathogens                                                                                            | Defensive compounds elucidated, <i>in vitro</i> defensive activity, <i>in vivo</i> fitness benefits        | 208-210      |
| Insecta,            | <i>Dendroctonus</i>                                                                           | Terrestrial                 | All life stages  | <i>Ogataea pini</i>                                                                                                   | Ectosymbiont                          | Volatile organic                                                        | Ethanol, carbon                                                                               | Other                                                                    | <i>Beauveria bassiana</i> insect                                                                                          | Defensive compounds elucidated, <i>in vitro</i> defensive activity                                         | 211          |

|                                  |                                                                                      |             |                                      |                                                                               |                            |                                       |                                                                                                                      |                            |                                                                                                                                                                      |                                                                                                     |              |
|----------------------------------|--------------------------------------------------------------------------------------|-------------|--------------------------------------|-------------------------------------------------------------------------------|----------------------------|---------------------------------------|----------------------------------------------------------------------------------------------------------------------|----------------------------|----------------------------------------------------------------------------------------------------------------------------------------------------------------------|-----------------------------------------------------------------------------------------------------|--------------|
| Coleoptera                       | <i>brevicomis</i> (Curculionidae)                                                    |             |                                      | (Saccharomycetales: Saccharomycetaceae)                                       |                            | compound production                   | disulfide (CS <sub>2</sub> ), delta-3-carene                                                                         | Other Terpene              | pathogen                                                                                                                                                             |                                                                                                     |              |
| Insecta, Coleoptera              | <i>Dendroctonus frontalis</i> (Curculionidae)                                        | Terrestrial | Fungal cultivars                     | <i>Streptomyces thermosacchari</i> (Actinobacteria)                           | Ectosymbiont               | Secondary metabolite production       | Mycangimycin (polyene)                                                                                               | Other (Polyene)            | Competing fungi                                                                                                                                                      | Defensive compounds elucidated, <i>in vitro</i> defensive activity                                  | 212, 213     |
| Insecta, Coleoptera              | <i>Dendroctonus frontalis</i> (Curculionidae)                                        | Terrestrial | Fungal cultivars                     | <i>Streptomyces</i> sp.                                                       | Ectosymbiont               | Secondary metabolite production       | Frontalamides A and B                                                                                                | PKS-NRPS                   | Unknown                                                                                                                                                              | Defensive compounds elucidated                                                                      | 214          |
| Insecta, Coleoptera              | Fungus-farming <i>Euwallacea validus</i> (Curculionidae)                             | Terrestrial | Fungal cultivars                     | Unknown cultivar fungus                                                       | Ectosymbiont               | Secondary metabolite production       | Cerulenin, Helvolic acid                                                                                             | Other Terpenoid            | Fungal pathogens of cultivars                                                                                                                                        | Defensive compounds elucidated, <i>in vitro</i> defensive activity                                  | 215          |
| Insecta, Coleoptera              | Alfalfa weevil: <i>Hypera postica</i> (Curculionidae)                                | Terrestrial | Not specified                        | <i>Wolbachia</i> ( $\alpha$ -proteobacteria) (and/or others)                  | Intracellular endosymbiont | Unknown                               | Unknown                                                                                                              | Unknown                    | Parasitoid wasp ( <i>Microctonus aethiopoidea</i> )                                                                                                                  | <i>In vivo</i> fitness benefits (specificity of association not confirmed)                          | 200, 216     |
| Insecta, Coleoptera              | Rove beetles: <i>Paederus</i> spp. (Staphylinidae)                                   | Terrestrial | Larvae (potentially others)          | <i>Pseudomonas</i> sp. ( $\beta$ -proteobacteria)                             | Extracellular endosymbiont | Production of bioactive compound      | Pederin (polyketide)                                                                                                 | <i>trans</i> -AT PKS       | Wolf spiders (Araneae: Lycosidae, Salticidae)                                                                                                                        | <i>In vivo</i> fitness benefits (decreased predation)                                               | 217-224      |
| Insecta, Hymenoptera             | <i>Microplitis demolitor</i> and other parasitoid wasps (Braconidae, Ichneumonidae)  | Terrestrial | Egg and larva                        | <i>Brachovirus</i> and <i>Ichnovirus</i> (Polydnviruses)                      | Endosymbiont               | Immunosuppression in parasitized host | Apoptosis induction, haemocyte clumping, phenoloxidase inhibition (various genes)                                    | -                          | Parasitized host immune system (usually Lepidoptera larvae)                                                                                                          | <i>In vivo</i> fitness benefits, characterization of genes responsible for protective function      | 225-227      |
| Insecta, Hymenoptera             | Various fungus-farming Attine species (Formicidae)                                   | Terrestrial | Fungal cultivars                     | <i>Pseudonocardia</i> spp. (Actinobacteria)                                   | Ectosymbiont               | Secondary metabolite production       | Dentigerumycin, five angucyclines and a nystatin-like compound                                                       | (NRPS-PKS?) (depsipeptide) | Specific activity against pathogen of fungal cultivars ( <i>Escovopsis</i> sp.)                                                                                      | Defensive compounds elucidated, <i>in vitro</i> defensive activity, <i>in vivo</i> fitness benefits | 228-236      |
| Insecta, Hymenoptera             | Various fungus-farming Attine species (Formicidae)                                   | Terrestrial | Fungal cultivars                     | <i>Streptomyces</i> spp., <i>Amycolatopsis</i> spp. (Actinobacteria)          | Ectosymbiont               | Secondary metabolite production       | Streptomycetes: Candicidin                                                                                           | PKS                        | Competing fungi                                                                                                                                                      | Defensive compounds elucidated, <i>in vitro</i> defensive activity                                  | 235, 237-240 |
| Insecta, Hymenoptera             | <i>Allomerus</i> ants (Formicidae)                                                   | Terrestrial | Fungal cultivars                     | <i>Streptomyces</i> spp. <i>Amycolatopsis</i> spp. (Actinobacteria)           | Ectosymbiont               | Secondary metabolite production       | Unknown                                                                                                              | Unknown                    | Competing fungi                                                                                                                                                      | defensive compounds elucidated, <i>in vitro</i> defensive activity                                  | 241          |
| Insecta, Hymenoptera, Formicidae | Fungus-farming <i>Atta sexdens</i> , <i>Atta texana</i> (Formicidae)                 | Terrestrial | Fungal cultivars and all life stages | Various killer yeasts (Basidiomycota, Ascomycota)                             | Ectosymbiont               | Secondary metabolite production       | Unknown mycocins                                                                                                     | Unknown                    | Fungal pathogens of cultivars and insects                                                                                                                            | <i>In vitro</i> defensive activity                                                                  | 242, 243     |
| Insecta, Hymenoptera             | Fungus-farming <i>Cyphomyrmex costatus</i> (Formicidae)                              | Terrestrial | Fungal cultivars                     | <i>Lepiota</i> sp.                                                            | Ectosymbiont               | Secondary metabolite production       | Lepiochlorin                                                                                                         | Other                      | Bacteria and fungi?                                                                                                                                                  | Defensive compounds elucidated                                                                      | 244          |
| Insecta, Hymenoptera             | Fungus-farming <i>Cyphomyrmex minutus</i> (Formicidae)                               | Terrestrial | Fungal cultivars and all life stages | <i>Tyridiomyces formicarum</i>                                                | Ectosymbiont               | Secondary metabolite production       | Several diketopiperazines                                                                                            | Other (peptide)            | Fungal pathogens of cultivars and insects                                                                                                                            | Defensive compounds elucidated                                                                      | 245          |
| Insecta, Hymenoptera             | Fungus-farming <i>Atta colombica</i> (Formicidae)                                    | Terrestrial | Fungal cultivars                     | <i>Leucocoprinus gongylophorus</i> (Lepiotaceae, Basidiomycota)               | Ectosymbiont               | Secondary metabolite production       | Unknown                                                                                                              | Unknown                    | Endophytic fungi within plant substrate of fungal cultivars                                                                                                          | <i>In vitro</i> defensive activity                                                                  | 246          |
| Insecta, Hymenoptera             | <i>Philanthus</i> spp., <i>Trachypus</i> spp., <i>Philantinus</i> spp. (Crabronidae) | Terrestrial | Larva, Pupa                          | <i>Streptomyces philanthi</i> (Actinobacteria)                                | Ectosymbiont               | Secondary metabolite production       | Cocktail containing streptochlorin and eight piericidin derivatives                                                  | PKS<br>PKS                 | Fungal and bacterial pathogens                                                                                                                                       | Defensive compounds elucidated, <i>in vitro</i> defensive activity, <i>in vivo</i> fitness benefits | 247-251      |
| Insecta, Hymenoptera             | Honey bees: <i>Apis</i> spp. (Apidae)                                                | Terrestrial | Larvae and Adult                     | <i>Lactobacillus</i> spp., <i>Bifidobacterium</i> ( $\alpha$ -proteobacteria) | Ectosymbiont               | Production of bioactive compounds     | Organic acids (lactic, formic, and acetic acids), hydrogen peroxide and various volatiles (benzene, toluene, octane, | Other<br>Lipid             | Bacterial and fungal pathogens ( <i>Melissococcus plutonius</i> , <i>Paenibacillus larvae Pseudomonas</i> , Enterobacteriaceae, <i>Bacillus</i> and <i>Candida</i> ) | <i>In vitro</i> defensive activity and <i>In vivo</i> fitness effects                               | 252-259      |

|                             |                                                                                                                                            |               |                     |                                                                                                                              |                                       |                                                                                             |                                                                                                      |                           |                                                                         |                                                                                                     |               |
|-----------------------------|--------------------------------------------------------------------------------------------------------------------------------------------|---------------|---------------------|------------------------------------------------------------------------------------------------------------------------------|---------------------------------------|---------------------------------------------------------------------------------------------|------------------------------------------------------------------------------------------------------|---------------------------|-------------------------------------------------------------------------|-----------------------------------------------------------------------------------------------------|---------------|
|                             |                                                                                                                                            |               |                     |                                                                                                                              |                                       |                                                                                             | ethylbenzene and nonane), 3-OH fatty acids, 2-heptanone and various peptides                         | Other Peptides            |                                                                         |                                                                                                     |               |
| Insecta, Hymenoptera        | Honey bees: <i>Apis</i> spp. (Apidae)                                                                                                      | Terrestrial   | Larvae and Adult    | <i>Bacillus</i> spp. (Firmicutes)                                                                                            | Ectosymbiont                          | Unknown (Proposed: production of bioactive compounds)                                       | Unknown                                                                                              | -                         | Pathogenic fungi Chalkbrood causative agent ( <i>Ascosphaera apis</i> ) | <i>In vitro</i> defensive activity                                                                  | 253, 260, 261 |
| Insecta, Hymenoptera        | Honey bees: <i>Apis</i> spp. (Apidae)                                                                                                      | Terrestrial   | Adult               | Mucorales, Aspergilli, Penicilli                                                                                             | Ectosymbiont                          | Unknown (Proposed: production of bioactive compounds)                                       | Unknown                                                                                              | -                         | Pathogenic fungi ( <i>Ascosphaera apis</i> )                            | <i>In vitro</i> defensive activity                                                                  | 252           |
| Insecta, Hymenoptera        | Bumble bees: <i>Bombus</i> spp. (Apidae)                                                                                                   | Terrestrial   | Adult               | <i>Gilliamella apicola</i>                                                                                                   | Ectosymbiont                          | Unknown (Proposed: colonization resistance)                                                 | Unknown                                                                                              | -                         | Gut trypanosomatid parasite ( <i>Crithidia bombi</i> )                  | Negative correlation between presence of symbiont and parasite in wild populations                  | 262-268       |
| Insecta, Diptera            | Mosquitoes: <i>Aedes</i> spp. (Culicidae)                                                                                                  | Terrestrial   | Adult               | <i>Wolbachia pipientis</i> ( $\alpha$ -proteobacteria)                                                                       | Intracellular endosymbiont            | Stimulation of immune system                                                                | Induces Toll pathway and antimicrobial peptide production in host                                    | -                         | Pathogenic viruses                                                      | <i>In vivo</i> reduction of virus titers and reduced transmission capacities                        | 269, 270      |
| Insecta, Diptera            | Mosquito: <i>Culex quinquefasciatus</i> (Culicidae)                                                                                        | Terrestrial   | Adult               | <i>Wolbachia pipientis</i> ( $\alpha$ -proteobacteria)                                                                       | Intracellular endosymbiont            | Unknown                                                                                     | Unknown                                                                                              | -                         | Pathogenic viruses                                                      | <i>In vivo</i> reduction of virus titers and reduced transmission capacities                        | 271           |
| Insecta, Diptera            | Fruit flies: <i>Drosophila</i> spp. Drosophilidae)                                                                                         | Terrestrial   | Adult               | <i>Wolbachia pipientis</i> ( $\alpha$ -proteobacteria)                                                                       | Intracellular endosymbiont            | Unknown hypothesized: stimulation of immune system and/or production of bioactive compound) | Unknown                                                                                              | -                         | Pathogenic viruses                                                      | <i>In vivo</i> fitness benefits                                                                     | 270-274       |
| Insecta, Diptera            | Fruit fly: <i>Drosophila hydei</i> (Drosophilidae)                                                                                         | Terrestrial   | Larva and Adult     | <i>Spiroplasma</i> sp. (Mollicutes)                                                                                          | Intra- and extracellular endosymbiont | Unknown                                                                                     | Unknown                                                                                              | -                         | Parasitoid wasp ( <i>Leptopilina heterotoma</i> )                       | <i>In vivo</i> fitness benefits                                                                     | 275           |
| Insecta, Diptera            | <i>Drosophila melanogaster</i> (Drosophilidae)                                                                                             | Terrestrial   | Food substrate      | Various yeasts                                                                                                               | Ectosymbiont                          | Secondary metabolite production                                                             | Unknown                                                                                              | Unknown                   | Aspergillus nidulans food competitor                                    | <i>In vivo</i> fitness benefits                                                                     | 276           |
| Insecta, Diptera            | Fruit fly: <i>Drosophila neotestacea</i> (Drosophilidae)                                                                                   | Terrestrial   | Adult               | <i>Spiroplasma</i> sp. (Mollicutes)                                                                                          | Intra- and extracellular endosymbiont | Unknown                                                                                     | Unknown ribosomal-inactivating protein                                                               | -                         | Nematode ( <i>Howardula aoronymphium</i> )                              | <i>In vivo</i> fitness benefits                                                                     | 274, 277      |
| Insecta, Diptera            | House fly: <i>Musca domestica</i> (Muscidae)                                                                                               | Terrestrial   | Larva               | <i>Klebsiella oxytoca</i> ( $\gamma$ -proteobacteria), <i>Bacillus cereus</i> (Firmicutes)                                   | Ectosymbiont                          | Unknown (proposed: colonization resistance or production of bioactive compounds)            | Unknown                                                                                              | -                         | Fungi                                                                   | <i>In vivo</i> fitness benefits                                                                     | 278           |
| Chordata, Tetraodontiformes | Atlantic salmon <i>Salmo salar</i> , gilthead seabream <i>Sparus aurata</i> , flathead mullet <i>Mugil cephalus</i> and other fish species | Limnic/Marine | Adult (gut)         | <i>Carnobacterium</i> , <i>Lactobacillus</i> and other Lactic acid bacteria (Firmicutes)                                     | Ectosymbiont                          | Colonization resistance, stimulation of immune system, production of bioactive compounds    | Bacteriocins (Carnocin UI49, Piscicocin V1, Divercin V41) and organic acids (lactic and acetic acid) | Ribosomal peptides, Other | Bacterial pathogens                                                     | <i>In vitro</i> defensive activity, <i>in vivo</i> fitness benefits, defensive compounds elucidated | 279-282       |
| Chordata, Tetraodontiformes | Puffer fish: <i>Spheroides rubripes</i> (Tetraodontidae) and several other marine organisms                                                | Marine        | Stage not specified | <i>Vibrio</i> , <i>Pseudomonas</i> , Actinomycetes and others (Proteobacteria, Actinobacteria, Firmicutes and Bacteroidetes) | Unknown                               | Secondary metabolite production                                                             | Tetrodotoxin                                                                                         | Other                     | Predators                                                               | Defensive compound elucidated                                                                       | 113, 115, 117 |

|           |                                                                                                                                                                                                                                                                 |                    |                                             |                                                                                                                |              |                                                                                        |                                                                                                                                                                                              |                            |                                                                                                             |                                                                                                                                               |              |
|-----------|-----------------------------------------------------------------------------------------------------------------------------------------------------------------------------------------------------------------------------------------------------------------|--------------------|---------------------------------------------|----------------------------------------------------------------------------------------------------------------|--------------|----------------------------------------------------------------------------------------|----------------------------------------------------------------------------------------------------------------------------------------------------------------------------------------------|----------------------------|-------------------------------------------------------------------------------------------------------------|-----------------------------------------------------------------------------------------------------------------------------------------------|--------------|
| Chordata, | Newts and Salamanders:<br><i>Taricha</i> spp.,<br><i>Cynops</i> spp. and others<br>(Caudata, Ambystomatidae and Salamandridae)<br><br>Frogs:<br><i>Atelopus</i> spp. and other anurans<br>(Anura: Brachycephalidae, Dendrobatidae, Bufonidae and Rhacophoridae) | Limnic/Terrestrial | Adult, eggs and larvae (some species)       | Unknown (bacterial origin uncertain)                                                                           | Unknown      | Secondary metabolite production                                                        | Tetrodotoxin                                                                                                                                                                                 | Other                      | Snake predators                                                                                             | Defensive compound elucidated, active secretion upon predator encounter, toxicity to predators, coevolutionary arms race with snake predators | 113, 283-288 |
| Chordata  | Red back salamander:<br><i>Plethodon cinereus</i><br>(Caudata: Salamandridae)                                                                                                                                                                                   | Limnic/Terrestrial | Adult (skin and gut)                        | <i>Janthinobacterium lividum</i><br>(β-proteobacteria)<br><br><i>Lysobacter gummosus</i><br>(γ-proteobacteria) | Ectosymbiont | Secondary metabolite production                                                        | Indole-3-carboxaldehyde and violacein<br><br>2,4-diacetylphloroglucinol                                                                                                                      | Other                      | Fungal pathogen ( <i>Batrachochytrium dendrobatidis</i> )                                                   | <i>In vitro</i> defensive activity , defensive compounds elucidated, co-occurrence of defensive compounds and symbiotic bacteria on host      | 289-293      |
| Chordata  | Mountain yellow-legged frog: <i>Rana muscosa</i><br>(Anura: Ranidae)                                                                                                                                                                                            | Limnic/Terrestrial | Adult (skin)                                | <i>Janthinobacterium lividum</i><br>(β-proteobacteria)                                                         | Ectosymbiont | Secondary metabolite production                                                        | Violacein                                                                                                                                                                                    | Other                      | Fungal pathogen ( <i>Batrachochytrium dendrobatidis</i> )                                                   | <i>In vivo</i> fitness benefits, defensive compound elucidated                                                                                | 294          |
| Chordata  | Mountain yellow-legged frog: <i>Rana muscosa</i><br>(Anura: Ranidae)                                                                                                                                                                                            | Limnic/Terrestrial | Adult (skin)                                | <i>Pseudomonas fluorescens</i><br>(γ-proteobacteria)                                                           | Ectosymbiont | Synergistic effect of compound with host immune system                                 | 2,4-diacetylphloroglucinol                                                                                                                                                                   | Other                      | Fungal pathogen <i>Batrachochytrium dendrobatidis</i> )                                                     | <i>In vitro</i> defensive activity , defensive compounds elucidated                                                                           | 295          |
| Chordata  | Hoopoe birds:<br><i>Upupa epops</i><br>(Coraciiformes: Upupidae)                                                                                                                                                                                                | Terrestrial        | Adult (feathers), and eggs                  | <i>Enterococcus faecalis</i><br>(Firmicutes)                                                                   | Ectosymbiont | Secondary metabolite production                                                        | Bacteriocins (enterocin MR10 and AS-48) and mixture of volatiles (main: Butanoic acid, 2-methyl butanoic acid, 4-methyl pentanoic acid, indole, 3-phenyl propanoic acid and 4-chloro indole) | Ribosomal peptides , Other | Bacterial pathogens ( <i>Bacillus licheniformis</i> , <i>Staphylococcus</i> and several Enterobacteriaceae) | <i>In vivo</i> fitness benefits, <i>in vitro</i> defensive activity , defensive compounds elucidated                                          | 296-301      |
| Chordata  | Human:<br><i>Homo sapiens</i><br>(Primates: Hominidae)                                                                                                                                                                                                          | Terrestrial        | Stage not specified (skin and nasal cavity) | <i>Staphylococcus epidermis</i><br>(Firmicutes)                                                                | Ectosymbiont | Secondary metabolite production, stimulation of immune system, colonization resistance | Epidermin, Pep5, epilancin K7 , modulin PSMγ and PSMδ, (thiolactone-containing pheromone AMPs), ESP serine protease                                                                          | Ribosomal peptides         | Pathogenic microbes ( <i>Staphylococcus aureus</i> )                                                        | <i>In vitro</i> defensive activity, defensive compounds elucidated, rate of pathogen colonization decreased in presence of symbiont.          | 302-306      |
| Chordata  | Human:<br><i>Homo sapiens</i><br>(Primates: Hominidae)                                                                                                                                                                                                          | Terrestrial        | Stage not specified (intestine)             | <i>Bacteroides fragilis</i><br>(Bacteroidetes)                                                                 | Ectosymbiont | Modulation of immune system suppresses inflammatory response)                          | Polysaccharide A (PSA)                                                                                                                                                                       | Other                      | Opportunistic bacterial pathogen ( <i>Helicobacter hepaticus</i> )                                          | <i>In vivo</i> fitness benefits, defensive compounds elucidated                                                                               | 307          |
| Chordata  | Laboratory mice<br><i>Mus musculus</i><br>(strain C57BL/6J)<br>(Rodentia: Muridae)                                                                                                                                                                              | Terrestrial        | Not specified                               | Herpesvirus                                                                                                    | Endosymbiont | Stimulation of immune system                                                           | Effect in immune system: prolonged production of the antiviral cytokine interferon-c and systemic activation of macrophages                                                                  | -                          | Bacterial pathogens ( <i>Listeria monocytogenes</i> and <i>Yersinia pestis</i> )                            | <i>In vivo</i> fitness benefits                                                                                                               | 308          |



## References

1. K. Konya, N. Shimidzu, N. Otaki, A. Yokoyama, K. Adachi and W. Miki, *Experientia*, 1995, **51**, 153-155.
2. S. Dash, C. L. Jin, O. O. Lee, Y. Xu and P. Y. Qian, *J. Ind. Microbiol. Biotechnol.*, 2009, **36**, 1047-1056.
3. S. Dash, Y. Nogata, X. J. Zhou, Y. F. Zhang, Y. Xu, X. R. Guo, X. X. Zhang and P. Y. Qian, *Bioresour. Technol.*, 2011, **102**, 7532-7537.
4. W. Miki, N. Otaki, A. Yokoyama and T. Kusumi, *Experientia*, 1996, **52**, 93-96.
5. M. D. Unson and D. J. Faulkner, *Experientia*, 1993, **49**, 349-353.
6. A. E. Flowers, M. J. Garson, R. I. Webb, E. J. Dumdei and R. D. Charan, *Cell Tissue Res.*, 1998, **292**, 597-607.
7. C. P. Ridley, P. R. Bergquist, M. K. Harper, D. J. Faulkner, J. N. A. Hooper and M. G. Haygood, *Chem. Biol.*, 2005, **12**, 397-406.
8. J. Faulkner, M. D. Unson and C. A. Bewley, *Pure Appl. Chem.*, 1994, **66**, 1983-1990.
9. M. D. Unson, N. D. Holland and D. J. Faulkner, *Mar. Biol.*, 1994, **119**, 1-11.
10. J. Vansande, F. Deneubourg, R. Beauwens, J. C. Braekman, D. Dalozze and J. E. Dumont, *Mol. Pharmacol.*, 1990, **37**, 583-589.
11. C. Giannini, C. Debitus, R. Lucas, A. Ubeda, M. Payá, J. N. A. Hooper and M. V. D'Auria, *J. Nat. Prod.*, 2001, **64**, 612-615.
12. P. Flatt, J. Gautschi, R. Thacker, M. Musafija-Girt, P. Crews and W. Gerwick, *Mar. Biol.*, 2005, **147**, 761-774.
13. R. Thacker, M. Diaz, K. Ruetzler, P. Erwin, S. Kimble, M. Pierce and S. Dillard, in *Porifera Research: Biodiversity, Innovation and Sustainability*, eds. M. Custódio, G. Lôbo-Hajdu, E. Hajdu and G. Muricy, Série Licros, Rio de Janeiro, Brazil, 2007, pp. 621-626.
14. D. Erpenbeck, J. N. A. Hooper, I. Bonnard, P. Sutcliffe, M. Chandra, P. Perio, C. Wolff, B. Banaigs, G. Worheide, C. Debitus and S. Petek, *Mar. Biol.*, 2012, **159**, 1119-1127.
15. R. Sakai, H. Kamiya, M. Murata and K. Shimamoto, *J. Am. Chem. Soc.*, 1997, **119**, 4112-4116.
16. R. Sakai, K. Yoshida, A. Kimura, K. Koike, M. Jimbo, K. Koike, A. Kobiyama and H. Kamiya, *Chembiochem*, 2008, **9**, 543-551.
17. T. K. Kim, M. J. Garson and J. A. Fuerst, *Environ. Microbiol.*, 2005, **7**, 509-518.
18. T. K. Kim, A. K. Hewavitharana, P. N. Shaw and J. A. Fuerst, *Appl. Environ. Microbiol.*, 2006, **72**, 2118-2125.
19. M. D. Higgs and D. J. Faulkner, *J. Org. Chem.*, 1978, **43**, 3454-3457.
20. V. Costantino, E. Fattorusso and A. Mangoni, *J. Org. Chem.*, 1993, **58**, 186-191.
21. V. Costantino, E. Fattorusso, A. Mangoni, M. Di Rosa and A. Ianaro, *J. Am. Chem. Soc.*, 1997, **119**, 12465-12470.
22. V. Costantino, E. Fattorusso, A. Mangoni, M. Di Rosa and A. Ianaro, *Bioorg. Med. Chem. Lett.*, 1999, **9**, 271-276.
23. C. Campagnuolo, E. Fattorusso, O. Tagliatalata-Scafati, A. Ianaro and B. Pisano, *European J. Org. Chem.*, 2002, **2002**, 61-69.
24. E. Fattorusso, S. Parapini, C. Campagnuolo, N. Basilico, O. Tagliatalata-Scafati and D. Taramelli, *J. Antimicrob. Chemother.*, 2002, **50**, 883-888.
25. C. Campagnuolo, E. Fattorusso, A. Romano, O. Tagliatalata-Scafati, N. Basilico, S. Parapini and D. Taramelli, *European J. Org. Chem.*, 2005, **2005**, 5077-5083.
26. M. Laroche, C. Imperatore, L. Grozdanov, V. Costantino, A. Mangoni, U. Hentschel and E. Fattorusso, *Mar. Biol.*, 2007, **151**, 1365-1373.
27. G. Della Sala, T. Hochmuth, V. Costantino, R. Teta, W. Gerwick, L. Gerwick, J. Piel and A. Mangoni, *Environ. Microbiol. Rep.*, 2013, **5**, 809-818.
28. R. H. Cichewicz, F. A. Valeriote and P. Crews, *Org. Lett.*, 2004, **6**, 1951-1954.
29. K. M. Fisch, C. Gurgui, N. Heycke, S. A. van der Sar, S. A. Anderson, V. L. Webb, S. Taudien, M. Platzter, B. K. Rubio, S. J. Robinson, P. Crews and J. Piel, *Nat. Chem. Biol.*, 2009, **5**, 494-501.
30. N. B. Perry, J. W. Blunt, M. H. G. Munro and L. K. Pannell, *J. Am. Chem. Soc.*, 1988, **110**, 4850-4851.
31. N. B. Perry, J. W. Blunt, M. H. G. Munro and A. M. Thompson, *J. Org. Chem.*, 1990, **55**, 223-227.
32. M. R. Bubb, I. Spector, A. D. Bershadsky and E. D. Korn, *J. Biol. Chem.*, 1995, **270**, 3463-3466.
33. C. A. Bewley, N. D. Holland and D. J. Faulkner, *Experientia*, 1996, **52**, 716-722.
34. C. A. Bewley and D. J. Faulkner, *J. Org. Chem.*, 1994, **59**, 4849-4852.
35. S. Matsunaga and N. Fusetani, *J. Org. Chem.*, 1995, **60**, 1177-1181.
36. E. W. Schmidt, C. A. Bewley and D. J. Faulkner, *J. Org. Chem.*, 1998, **63**, 1254-1258.
37. E. W. Schmidt, A. Y. Obratsova, S. K. Davidson, D. J. Faulkner and M. G. Haygood, *Mar. Biol.*, 2000, **136**, 969-977.
38. S. Sakemi, T. Ichiba, S. Kohmoto, G. Saucy and T. Higa, *J Am Chem Soc*, 1988, **110**, 4851-4853.
39. N. Fusetani, T. Sugawara and S. Matsunaga, *The Journal of Organic Chemistry*, 1992, **57**, 3828-3832.
40. M. Iwamoto, H. Shimizu, I. Muramatsu, S. Matsunaga and S. Oiki, *J Physiol Sci*, 2010, **60**, S121-S121.
41. M. F. Freeman, C. Gurgui, M. J. Helf, B. I. Morinaka, A. R. Uria, N. J. Oldham, H. G. Sahl, S. Matsunaga and J. Piel, *Science*, 2012, **338**, 387-390.
42. M. C. Wilson, T. Mori, C. Ruckert, A. R. Uria, M. J. Helf, K. Takada, C. Gernert, U. A. E. Steffens, N. Heycke, S. Schmitt, C. Rinke, E. J. N. Helfrich, A. O. Brachmann, C. Gurgui, T. Wakimoto, M. Kracht, M. Crusemann, U. Hentschel, I. Abe, S. Matsunaga, J. Kalinowski, H. Takeyama and J. Piel, *Nature*, 2014, **506**, 58-62.
43. J. Piel, D. Q. Hui, N. Fusetani and S. Matsunaga, *Environ Microbiol*, 2004, **6**, 921-927.
44. J. Piel, D. Q. Hui, G. P. Wen, D. Butzke, M. Platzter, N. Fusetani and S. Matsunaga, *P Natl Acad Sci USA*, 2004, **101**, 16222-16227.
45. M. Kimura, T. Wakimoto, Y. Egami, K. C. Tan, Y. Ise and I. Abe, *J. Nat. Prod.*, 2012, **75**, 290-294.
46. T. Wakimoto, Y. Egami, Y. Nakashima, Y. Wakimoto, T. Mori, T. Awakawa, T. Ito, H. Kenmoku, Y. Asakawa, J. Piel and I. Abe, *Nat. Chem. Biol.*, 2014, **10**, 648-655.
47. W. O'Neal and J. R. Pawlik, *Mar. Ecol. Prog. Ser.*, 2002, **240**, 117-126.
48. L. D. Mydlarz, R. S. Jacobs, J. Boehnlein and R. G. Kerr, *Chem. Biol.*, 2003, **10**, 1051-1056.
49. J. M. Boehnlein, L. Z. Santiago-Vazquez and R. G. Kerr, *Mar. Ecol. Prog. Ser.*, 2005, **303**, 105-111.
50. N. W. Withers, W. Kokke, W. Fenical and C. Djerassi, *Proc. Natl. Acad. Sci. U. S. A.*, 1982, **79**, 3764-3768.
51. R. G. Kerr, L. C. Rodriguez and J. Kellman, *Tetrahedron Lett.*, 1996, **37**, 8301-8304.
52. R. D. A. Epifanio, L. F. Maia, J. R. Pawlik and W. Fenical, *Mar. Ecol. Prog. Ser.*, 2007, **329**, 307-310.
53. F. Romero, F. Espliego, J. P. Baz, T. G. DeQuesada, D. Gravalos, F. DelaCalle and J. L. FernandezPuertes, *J. Antibiot.*, 1997, **50**, 734-737.
54. S. Fraune, F. Anton-Erxleben, R. Augustin, S. Franzenburg, M. Knop, K. Schröder, D. Wolloweit-Ohl and T. C. G. Bosch, *ISME J.*, 2014.

55. R. M. Woollacott, *Mar. Biol.*, 1981, **65**, 155-158.
56. M. G. Haygood and S. K. Davidson, *Appl. Environ. Microbiol.*, 1997, **63**, 4612-4616.
57. S. K. Davidson and M. G. Haygood, *Biol. Bull.*, 1999, **196**, 273-280.
58. S. K. Davidson, S. W. Allen, G. E. Lim, C. M. Anderson and M. G. Haygood, *Appl. Environ. Microbiol.*, 2001, **67**, 4531-4537.
59. T. M. McGovern and M. E. Hellberg, *Mol. Ecol.*, 2003, **12**, 1207-1215.
60. M. Hildebrand, L. E. Waggoner, H. B. Liu, S. Sudek, S. Allen, C. Anderson, D. H. Sherman and M. Haygood, *Chem. Biol.*, 2004, **11**, 1543-1552.
61. N. Lopanik, N. Lindquist and N. Targett, *Oecologia*, 2004, **139**, 131-139.
62. N. B. Lopanik, N. M. Targett and N. Lindquist, *Appl. Environ. Microbiol.*, 2006, **72**, 7941-7944.
63. N. B. Lopanik, N. M. Targett and N. Lindquist, *Mar. Ecol. Prog. Ser.*, 2006, **327**, 183-191.
64. K. H. Sharp, S. K. Davidson and M. G. Haygood, *ISME J.*, 2007, **1**, 693-702.
65. S. Sudek, N. B. Lopanik, L. E. Waggoner, M. Hildebrand, C. Anderson, H. B. Liu, A. Patel, D. H. Sherman and M. G. Haygood, *J. Nat. Prod.*, 2007, **70**, 67-74.
66. A. E. Trindade-Silva, G. E. Lim-Fong, K. H. Sharp and M. G. Haygood, *Curr. Opin. Biotechnol.*, 2010, **21**, 834-842.
67. N. B. Lopanik, *Funct. Ecol.*, 2014, **28**, 328-340.
68. B. Carte and D. J. Faulkner, *J. Chem. Ecol.*, 1986, **12**, 795-804.
69. S. Matsunaga, N. Fusetani and K. Hashimoto, *Experientia*, 1986, **42**, 84-84.
70. A. Franks, P. Haywood, C. Holmstrom, S. Egan, S. Kjelleberg and N. Kumar, *Molecules*, 2005, **10**, 1286-1291.
71. A. Franks, S. Egan, C. Holmstrom, S. James, H. Lappin-Scott and S. Kjelleberg, *Appl. Environ. Microbiol.*, 2006, **72**, 6079-6087.
72. C. Burke, T. Thomas, S. Egan and S. Kjelleberg, *Environ. Microbiol.*, 2007, **9**, 814-818.
73. C. K. Narkowicz, A. J. Blackman, E. Lacey, J. H. Gill and K. Heiland, *J. Nat. Prod.*, 2002, **65**, 938-941.
74. J. T. Walls, A. J. Blackman and D. A. Ritz, *J. Chem. Ecol.*, 1991, **17**, 1871-1881.
75. J. T. Walls, A. J. Blackman and D. A. Ritz, *Hydrobiologia*, 1995, **297**, 163-172.
76. A. R. Carroll, S. Duffy, M. Sykes and V. M. Avery, *Organic & Biomolecular Chemistry*, 2011, **9**, 604-609.
77. Y. H. Choi, A. Park, F. J. Schmitz and I. Vanaltna, *J. Nat. Prod.*, 1993, **56**, 1431-1433.
78. U. Anthoni, P. H. Nielsen, M. Pereira and C. Christophersen, *Comp. Biochem. Physiol. Part B Biochem. Mol. Biol.*, 1990, **96**, 431-437.
79. L. Peters, A. D. Wright, A. Krick and G. M. Konig, *J. Chem. Ecol.*, 2004, **30**, 1165-1181.
80. M. Tischler, S. W. Ayer and R. J. Andersen, *Comp. Biochem. Physiol. Part B Biochem. Mol. Biol.*, 1986, **84**, 43-45.
81. R. Kazlauskas, J. F. Marwood, P. T. Murphy and R. J. Wells, *Aust. J. Chem.*, 1982, **35**, 215-217.
82. V. J. Paul, N. Lindquist and W. Fenical, *Mar. Ecol. Prog. Ser.*, 1990, **59**, 109-118.
83. K. L. Rinehart, J. B. Gloer, J. C. Cook, S. A. Mizsak and T. A. Scahill, *J. Am. Chem. Soc.*, 1981, **103**, 1857-1859.
84. K. L. Rinehart, J. B. Gloer, R. G. Hughes, H. E. Renis, J. P. McGovren, E. B. Swynenberg, D. A. Stringfellow, S. L. Kuentzel and L. H. Li, *Science*, 1981, **212**, 933-935.
85. N. Lindquist, M. E. Hay and W. Fenical, *Ecol. Monogr.*, 1992, **62**, 547-568.
86. N. Lindquist and M. E. Hay, *Ecology*, 1995, **76**, 1347-1358.
87. H. L. Sings and K. L. Rinehart, *J. Ind. Microbiol. Biotechnol.*, 1996, **17**, 385-396.
88. N. Lindquist, *J. Chem. Ecol.*, 2002, **28**, 1987-2000.
89. M. Tsukimoto, M. Nagaoka, Y. Shishido, J. Fujimoto, F. Nishisaka, S. Matsumoto, E. Harunari, C. Imada and T. Matsuzaki, *J. Nat. Prod.*, 2011, **74**, 2329-2331.
90. Y. Xu, R. D. Kersten, S. J. Nam, L. Lu, A. M. Al-Suwailem, H. J. Zheng, W. Fenical, P. C. Dorrestein, B. S. Moore and P. Y. Qian, *J. Am. Chem. Soc.*, 2012, **134**, 8625-8632.
91. C. Ireland and P. J. Scheuer, *J. Am. Chem. Soc.*, 1980, **102**, 5688-5691.
92. D. F. Sesin, S. J. Gaskell and C. M. Ireland, *Bull. Soc. Chim. Belg.*, 1986, **95**, 853-867.
93. P. F. Long, W. C. Dunlap, C. N. Battershill and M. Jaspars, *Chembiochem*, 2005, **6**, 1760-1765.
94. E. W. Schmidt, J. T. Nelson, D. A. Rasko, S. Sudek, J. A. Eisen, M. G. Haygood and J. Ravel, *Proc. Natl. Acad. Sci. U. S. A.*, 2005, **102**, 7315-7320.
95. M. S. Donia, B. J. Hathaway, S. Sudek, M. G. Haygood, M. J. Rosovitz, J. Ravel and E. W. Schmidt, *Nat. Chem. Biol.*, 2006, **2**, 729-735.
96. M. S. Donia, J. Ravel and E. W. Schmidt, *Nat. Chem. Biol.*, 2008, **4**, 341-343.
97. E. W. Schmidt, in *Defensive Mutualism in Microbial Symbiosis*, eds. J. F. White and M. S. Torres, Boca Raton, FL, USA, 2009, pp. 65-83.
98. T. M. Zabriskie, C. L. Mayne and C. M. Ireland, *J. Am. Chem. Soc.*, 1988, **110**, 7919-7920.
99. A. D. Richardson, W. Aalbersberg and C. M. Ireland, *Anti-Cancer Drugs*, 2005, **16**, 533-541.
100. M. S. Donia, W. F. Fricke, F. Partensky, J. Cox, S. I. Elshahawi, J. R. White, A. M. Phillippy, M. C. Schatz, J. Piel, M. G. Haygood, J. Ravel and E. W. Schmidt, *Proc. Natl. Acad. Sci. U. S. A.*, 2011, **108**, E1423-E1432.
101. J. C. Kwan, M. S. Donia, A. W. Han, E. Hirose, M. G. Haygood and E. W. Schmidt, *Proc. Natl. Acad. Sci. U. S. A.*, 2012, **109**, 20655-20660.
102. J. C. Kwan and E. W. Schmidt, *PLoS One*, 2013, **8**, e80822.
103. D. Gouiffes, M. Juge, N. Grimaud, L. Welin, M. P. Sauviat, Y. Barbin, D. Laurent, C. Roussakis, J. P. Henichart and J. F. Verbist, *Toxicon*, 1988, **26**, 1129-1136.
104. B. M. Degnan, C. J. Hawkins, M. F. Lavin, E. J. McCaffrey, D. L. Parry, A. L. Vandenbrenk and D. J. Watters, *J. Med. Chem.*, 1989, **32**, 1349-1354.
105. J. F. Biard, C. Grivois, J. F. Verbist, C. Debitus and J. B. Carre, *J. Mar. Biol. Assoc. U. K.*, 1990, **70**, 741-746.
106. J. F. Biard, C. Roussakis, J. M. Kornprobst, D. Gouiffesbarbin, J. F. Verbist, P. Cotellet, M. P. Foster, C. M. Ireland and C. Debitus, *J. Nat. Prod.*, 1994, **57**, 1336-1345.
107. C. S. Riesenfeld, A. E. Murray and B. J. Baker, *J. Nat. Prod.*, 2008, **71**, 1812-1818.
108. C. Moss, D. H. Green, B. Perez, A. Velasco, R. Henriquez and J. D. McKenzie, *Mar. Biol.*, 2003, **143**, 99-110.
109. A. E. Perez-Matos, W. Rosado and N. S. Govind, *Antonie Van Leeuwenhoek*, 2007, **92**, 155-164.
110. C. M. Rath, B. Janto, J. Earl, A. Ahmed, F. Z. Hu, L. Hiller, M. Dahlgren, R. Kreft, F. A. Yu, J. J. Wolff, H. K. Kweon, M. A. Christiansen, K. Hakansson, R. M. Williams, G. D. Ehrlich and D. H. Sherman, *ACS Chem. Biol.*, 2011, **6**, 1244-1256.
111. G. Steinert, M. W. Taylor and P. J. Schupp, *Mar. Biotechnol.*, 2015, **in press**.

112. J. Kobayashi and M. Ishibashi, *Chem. Rev.*, 1993, **93**, 1753-1769.
113. J. W. Daly, *J. Nat. Prod.*, 2004, **67**, 1211-1215.
114. M. Asakawa, K. Ito and H. Kajihara, *Toxins*, 2013, **5**, 376-395.
115. V. Pratheepa and V. Vasconcelos, *Environ. Toxicol. Pharmacol.*, 2013, **36**, 1046-1054.
116. V. Bane, M. Lehane, M. Dikshit, A. Riordan and A. Furey, *Toxins*, 2014, **6**, 693-755.
117. T. Y. Magarlamov, I. A. Beleneva, A. V. Chernyshev and A. D. Kuhlevsky, *Toxicon*, 2014, **85**, 46-51.
118. S. K. Goffredi, A. Warén, V. J. Orphan, C. L. Van Dover and R. C. Vrijenhoek, *Appl. Environ. Microbiol.*, 2004, **70**, 3082-3090.
119. Y. Suzuki, R. E. Kopp, T. Kogure, A. Suga, K. Takai, S. Tsuchida, N. Ozaki, K. Endo, J. Hashimoto, Y. Kato, C. Mizota, T. Hirata, H. Chiba, K. H. Nealson, K. Horikoshi and J. L. Kirschvink, *Earth Planet. Sci. Lett.*, 2006, **242**, 39-50.
120. H. Yao, M. Dao, T. Imholt, J. Huang, K. Wheeler, A. Bonilla, S. Suresh and C. Ortiz, *Proc. Natl. Acad. Sci. U. S. A.*, 2010, **107**, 987-992.
121. O. Peraud, J. S. Biggs, R. W. Huguen, A. R. Light, G. P. Concepcion, B. M. Olivera and E. W. Schmidt, *Appl. Environ. Microbiol.*, 2009, **75**, 6820-6826.
122. Z. J. Lin, R. R. Antemano, R. W. Huguen, M. D. B. Tianero, O. Peraud, M. G. Haygood, G. P. Concepcion, B. M. Olivera, A. Light and E. W. Schmidt, *J. Nat. Prod.*, 2010, **73**, 1922-1926.
123. Z. Lin, C. A. Reilly, R. Antemano, R. W. Huguen, L. Marett, G. P. Concepcion, M. G. Haygood, B. M. Olivera, A. Light and E. W. Schmidt, *J. Med. Chem.*, 2011, **54**, 3746-3755.
124. Z. J. Lin, L. Marett, R. W. Huguen, M. Flores, I. Forteza, M. A. Ammon, G. P. Concepcion, S. Espino, B. M. Olivera, G. Rosenberg, M. G. Haygood, A. R. Light and E. W. Schmidt, *Bioorg. Med. Chem. Lett.*, 2013, **23**, 4867-4869.
125. A. Marin, L. A. Alvarez, G. Cimino and A. Spinella, *J. Molluscan Stud.*, 1999, **65**, 121-131.
126. Z. J. Lin, J. P. Torres, M. A. Ammon, L. Marett, R. W. Teichert, C. A. Reilly, J. C. Kwan, R. W. Huguen, M. Flores, M. D. Tianero, O. Peraud, J. E. Cox, A. R. Light, A. J. L. Villaraza, M. G. Haygood, G. P. Concepcion, B. M. Olivera and E. W. Schmidt, *Chem. Biol.*, 2013, **20**, 73-81.
127. D. L. Distel, D. J. Beaudoin and W. Morrill, *Appl. Environ. Microbiol.*, 2002, **68**, 6292-6299.
128. D. L. Distel, W. Morrill, N. MacLaren-Toussaint, D. Franks and J. Waterbury, *Int. J. Syst. Evol. Microbiol.*, 2002, **52**, 2261-2269.
129. W. R. Harris, S. A. Amin, F. C. Kupper, D. H. Green and C. J. Carrano, *J. Am. Chem. Soc.*, 2007, **129**, 12263-12271.
130. J. C. Yang, R. Madupu, A. S. Durkin, N. A. Ekborg, C. S. Pedomallu, J. B. Hostetler, D. Radune, B. S. Toms, B. Henrissat, P. M. Coutinho, S. Schwarz, L. Field, A. E. Trindade-Silva, C. A. G. Soares, S. Elshahawi, A. Hanora, E. W. Schmidt, M. G. Haygood, J. Posfai, J. Benner, C. Madinger, J. Nove, B. Anton, K. Chaudhary, J. Foster, A. Holman, S. Kumar, P. A. Lessard, Y. A. Luyten, B. Slatko, N. Wood, B. Wu, M. Teplitski, J. D. Mougous, N. Ward, J. A. Eisen, J. H. Badger and D. L. Distel, *PLoS One*, 2009, **4**, e6085.
131. M. A. Betcher, J. M. Fung, A. W. Han, R. O'Connor, R. Seronay, G. P. Concepcion, D. L. Distel and M. G. Haygood, *PLoS One*, 2012, **7**, e45309.
132. S. I. Elshahawi, A. E. Trindade-Silva, A. Hanora, A. W. Han, M. S. Flores, V. Vizzoni, C. G. Schrago, C. A. Soares, G. P. Concepcion, D. L. Distel, E. W. Schmidt and M. G. Haygood, *Proc. Natl. Acad. Sci. U. S. A.*, 2013, **110**, E295-E304.
133. Z. Lin, M. Koch, C. D. Pond, G. Mabeza, R. A. Seronay, G. P. Concepcion, L. R. Barrows, B. M. Olivera and E. W. Schmidt, *J. Antibiot.*, 2014, **67**.
134. D. F. Hwang, O. Arakawa, T. Saito, T. Noguchi, U. Simidu, K. Tsukamoto, Y. Shida and K. Hashimoto, *Mar. Biol.*, 1989, **100**, 327-332.
135. R. Chau, J. A. Kalaitzis and B. A. Neilan, *Aquat. Toxicol.*, 2011, **104**, 61-72.
136. E. G. Ruby, *Annu. Rev. Microbiol.*, 1996, **50**, 591-624.
137. B. W. Jones and M. K. Nishiguchi, *Mar. Biol.*, 2004, **144**, 1151-1155.
138. S. V. Nyholm and M. J. McFall-Ngai, *Nat. Rev. Microbiol.*, 2004, **2**, 632-642.
139. M. J. McFall-Ngai, *Annu. Rev. Microbiol.*, 2014, **68**, 177-194.
140. W. Declair and A. Richard, in *Biologisch Jaarboek (Dodonaea)*, Koninklijk Natuurwetenschappelijk Genootschap Dodonaea, Gent, Belgium, 1972.
141. A. Richard, C. Van den Branden and W. Declair, in *Cyclic Phenomena in Marine Plants and Animals: Proceedings of the 13th European Marine Biology Symposium*, eds. E. Naylor and R. G. Hartnoll, Pergamon Press, Exeter, UK, 1979, pp. 173-180.
142. C. Van den Branden, M. Gillis and A. Richard, *Comp. Biochem. Physiol. Part B Biochem. Mol. Biol.*, 1980, **66**, 331-334.
143. A. Lum-Kong, *J. Zool.*, 1992, **226**, 469-490.
144. E. Barbieri, K. Barry, A. Child and N. Wainwright, *Biol. Bull.*, 1997, **193**, 275-276.
145. M. R. Kaufman, Y. Ikeda, C. Patton, G. Van Dykhuizen and D. Epel, *Biol. Bull.*, 1998, **194**, 36-43.
146. S. Grigioni, R. Boucher-Rodoni, A. Demarta, M. Tonolla and R. Peduzzi, *Mar. Biol.*, 2000, **136**, 217-222.
147. E. Barbieri, B. J. Paster, D. Hughes, L. Zurek, D. P. Moser, A. Teske and M. L. Sogin, *Environ. Microbiol.*, 2001, **3**, 151-167.
148. K. Benkendorff, A. R. Davis and J. Bremner, *J. Invertebr. Pathol.*, 2001, **78**, 109-118.
149. P. Gomathi, J. R. Nair and P. M. Sherief, *Indian J. Mar. Sci.*, 2010, **39**, 100-104.
150. J. R. Nair, D. Pillai, S. M. Joseph, P. Gomathi, P. V. Senan and P. M. Sherief, *Indian J. Geomarine Sci.*, 2011, **40**, 13-27.
151. A. J. Collins, B. A. LaBarre, B. S. Wong Won, M. V. Shah, S. Heng, M. H. Choudhury, S. A. Haydar, J. Santiago and S. V. Nyholm, *Appl. Environ. Microbiol.*, 2012, **78**, 4200-4208.
152. M. S. Gil-Turnes, M. E. Hay and W. Fenical, *Science*, 1989, **246**, 116-118.
153. M. S. Gil-Turnes and W. Fenical, *Biol. Bull.*, 1992, **182**, 105-108.
154. N. Lindquist, P. H. Barber and J. B. Weisz, *Proc. R. Soc. Biol. Sci. Ser. B*, 2005, **272**, 1209-1216.
155. J. M. Crawford, C. Portmann, X. Zhang, M. B. J. Roeffaers and J. Clardy, *Proc. Natl. Acad. Sci. U. S. A.*, 2012, **109**, 10821-10826.
156. R. J. Akhurst, *J. Gen. Microbiol.*, 1982, **128**, 3061-3065.
157. S. Derzelle, E. Duchaud, F. Kunst, A. Danchin and P. Bertin, *Appl. Environ. Microbiol.*, 2002, **68**, 3780-3789.
158. T. A. Ciche, M. Blackburn, J. R. Carney and J. C. Ensign, *Appl. Environ. Microbiol.*, 2003, **69**, 4706-4713.
159. F. Sztaricskai, Z. Dinya, G. Y. Batta, E. Szallas, A. Szentirmai and A. Fodor, *ACH Models Chem.*, 1992, **129**, 697-707.
160. V. J. Paul, S. Frautschy, W. Fenical and K. H. Nealson, *J. Chem. Ecol.*, 1981, **7**, 589-597.
161. W. H. Richardson, T. M. Schmidt and K. H. Nealson, *Appl. Environ. Microbiol.*, 1988, **54**, 1602-1605.
162. J. Li, G. Chen, H. Wu and J. M. Webster, *Appl. Environ. Microbiol.*, 1995, **61**, 4329-4333.
163. K. Hu, J. Li and J. M. Webster, *J. Chromatogr. B Biomed. Sci. Appl.*, 1997, **703**, 177-183.
164. K. Hu and J. M. Webster, *FEMS Microbiol. Lett.*, 2000, **189**, 219-223.
165. I. Eleftherianos, S. Boundy, S. A. Joyce, S. Aslam, J. W. Marshall, R. J. Cox, T. J. Simpson, D. J. Clarke, R. H. French-Constant and S. E. Reynolds, *Proc. Natl. Acad. Sci. U. S. A.*, 2007, **104**, 2419-2424.

166. L. Lango-Scholey, A. O. Brachmann, H. B. Bode and D. J. Clarke, *PLoS One*, 2013, **8**, e82152.
167. A. O. Brachmann, S. A. Joyce, H. Jenke-Kodama, G. Schwar, D. J. Clarke and H. B. Bode, *Chembiochem*, 2007, **8**, 1721-1728.
168. K. Hu, J. Li, W. Wang, H. Wu, H. Lin and J. M. Webster, *Can. J. Microbiol.*, 1998, **44**, 1072-1077.
169. N. E. Boemare, M. H. Boyergiglio, J. O. Thaler, R. J. Akhurst and M. Brehelin, *Appl. Environ. Microbiol.*, 1992, **58**, 3032-3037.
170. S. Sharma, N. Waterfield, D. Bowen, T. Rocheleau, L. Holland, R. James and R. ffrench-Constant, *FEMS Microbiol. Lett.*, 2002, **214**, 241-249.
171. R. ffrench-Constant, N. Waterfield, P. Daborn, S. Joyce, H. Bennett, C. Au, A. Dowling, S. Boundy, S. Reynolds and D. Clarke, *FEMS Microbiol. Rev.*, 2003, **26**, 433-456.
172. J. Jarosz, *Parasitology*, 1996, **112**, 545-552.
173. M. E. Baur, H. K. Kaya and D. R. Strong, *Biol. Control*, 1998, **12**, 231-236.
174. P. J. Isaacson and J. M. Webster, *J. Invertebr. Pathol.*, 2002, **79**, 146-153.
175. X. S. Zhou, H. K. Kaya, K. Heungens and H. Goodrich-Blair, *Appl. Environ. Microbiol.*, 2002, **68**, 6202-6209.
176. S. W. Fuchs, F. Grundmann, M. Kurz, M. Kaiser and H. B. Bode, *Chembiochem*, 2014, **15**, 512-516.
177. B. V. McInerney, R. P. Gregson, M. J. Lacey, R. J. Akhurst, G. R. Lyons, S. H. Rhodes, D. R. Smith, L. M. Engelhardt and A. H. White, *J. Nat. Prod.*, 1991, **54**, 774-784.
178. J. Li, K. Hu and J. M. Webster, *Chem. Heterocycl. Compd.*, 1998, **34**, 1331-1339.
179. F. Grundmann, M. Kaiser, M. Kurz, M. Schiell, A. Batzer and H. B. Bode, *RSC Advances*, 2013, **3**, 22072-22077.
180. B. V. McInerney, W. C. Taylor, M. J. Lacey, R. J. Akhurst and R. P. Gregson, *J. Nat. Prod.*, 1991, **54**, 785-795.
181. G. Lang, T. Kalvelage, A. Peters, J. Wiese and J. F. Imhoff, *J. Nat. Prod.*, 2008, **71**, 1074-1077.
182. J. M. Crawford, C. Portmann, R. Kontnik, C. T. Walsh and J. Clardy, *Org. Lett.*, 2011, **13**, 5144-5147.
183. D. Ji, Y. Yi, G. H. Kang, Y. H. Choi, P. Kim, N. I. Baek and Y. Kim, *FEMS Microbiol. Lett.*, 2004, **239**, 241-248.
184. J. Li, G. Chen and J. M. Webster, *Can. J. Microbiol.*, 1997, **43**, 770-773.
185. J. O. Thaler, S. Baghdiguian and N. Boemare, *Appl. Environ. Microbiol.*, 1995, **61**, 2049-2052.
186. N. Boemare, A. Givaudan, M. Brehelin and C. Laumond, *Symbiosis*, 1997, **22**, 21-45.
187. H. Hawlena, F. Bashey and C. M. Lively, *Ecol. Evol.*, 2012, **2**, 2516-2521.
188. D. K. Aanen, H. H. de Fine Licht, A. J. Debets, N. A. Kerstes, R. F. Hoekstra and J. J. Boomsma, *Science*, 2009, **326**, 1103-1106.
189. A. A. Visser, T. Nobre, C. R. Currie, D. K. Aanen and M. Poulsen, *Microb. Ecol.*, 2012, **63**, 975-985.
190. G. Carr, M. Poulsen, J. L. Klassen, Y. Hou, T. P. Wyche, T. S. Bugni, C. R. Currie and J. Clardy, *Org. Lett.*, 2012, **14**, 2822-2825.
191. R. J. Dillon and A. K. Charnley, *J. Invertebr. Pathol.*, 1995, **66**, 72-75.
192. R. Dillon and K. Charnley, *Res. Microbiol.*, 2002, **153**, 503-509.
193. R. J. Dillon, C. T. Vennard, A. Buckling and A. K. Charnley, *Ecol. Lett.*, 2005, **8**, 1291-1298.
194. T. A. Hendry, M. S. Hunter and D. A. Baltrus, *Appl. Environ. Microbiol.*, 2014, **88**, 7161-7168.
195. C. Vorburger, L. Gehrler and P. Rodriguez, *Biol. Lett.*, 2010, **6**, 109-111.
196. K. M. Oliver, J. A. Russell, N. A. Moran and M. S. Hunter, *Proc. Natl. Acad. Sci. U. S. A.*, 2003, **100**, 1803-1807.
197. N. A. Moran, P. H. Degnan, S. R. Santos, H. E. Dunbar and H. Ochman, *Proc. Natl. Acad. Sci. U. S. A.*, 2005, **102**, 16919-16926.
198. K. M. Oliver, N. A. Moran and M. S. Hunter, *Proc. Natl. Acad. Sci. U. S. A.*, 2005, **102**, 12795-12800.
199. P. H. Degnan and N. A. Moran, *Appl. Environ. Microbiol.*, 2008, **74**, 6782-6791.
200. K. M. Oliver and N. A. Moran, in *Defensive mutualism in microbial symbiosis*, eds. J. F. White and M. S. Torres, CRC Press, Boca Raton, FL, USA, 2009, pp. 129-148.
201. C. Vorburger, C. Sandrock, A. Gousskov, L. E. Castañeda and J. Ferrari, *Evolution*, 2009.
202. M. Schmid, R. Sieber and Y. S. Zimmermann, *Funct. Ecol.*, 2012, **26**, 207-215.
203. C. L. Scarborough, J. Ferrari and H. C. J. Godfray, *Science*, 2005, **310**, 1781-1781.
204. P. Łukasik, M. van Asch, H. Guo and J. Ferrari, *Ecol. Lett.*, 2013, **16**, 214-218.
205. B. J. Parker, C. J. Spragg, B. Altincicek and N. M. Gerardo, *Appl. Environ. Microbiol.*, 2013, **79**, 2455-2458.
206. A. Nakabachi, R. Ueoka, K. Oshima, R. Teta, A. Mangoni, M. Gurgui, N. J. Oldham, G. van Echten-Deckert, K. Okamura, K. Yamamoto, H. Inoue, M. Ohkuma, Y. Hongoh, S.-y. Y. Miyagishima, M. Hattori, J. Piel and T. Fukatsu, *Curr. Biol.*, 2013, **23**, 1478-1484.
207. A. K. Hansen, G. Jeong, T. D. Paine and R. Stouthamer, *Appl. Environ. Microbiol.*, 2007, **73**, 7531-7535.
208. C. Kobayashi, Y. Fukasawa, D. Hirose and M. Kato, *Evol. Ecol.*, 2008, **22**, 711-722.
209. X. Li, G. Wheeler and J. Ding, *Arthropod Plant Interact.*, 2012, **6**, 417-424.
210. L. Wang, Y. Feng, J. Tian, M. Xiang, J. Sun, J. Ding, W.-B. Yin, M. Stadler, Y. Che and X. Liu, *ISME Journal*, 2015.
211. T. S. Davis, R. W. Hofstetter, J. T. Foster, N. E. Foote and P. Keim, *Microb. Ecol.*, 2011, **61**, 626-634.
212. J. J. Scott, D. C. Oh, M. C. Yuceer, K. D. Klepzig, J. Clardy and C. R. Currie, *Science*, 2008, **322**, 63-63.
213. D. C. Oh, J. J. Scott, C. R. Currie and J. Clardy, *Org. Lett.*, 2009, **11**, 633-636.
214. J. A. V. Blodgett, D. C. Oh, S. G. Cao, C. R. Currie, R. Kolter and J. Clardy, *Proc. Natl. Acad. Sci. U. S. A.*, 2010, **107**, 11692-11697.
215. T. Nakashima, T. Iizuka, K. Ogura, M. Maeda and T. Tanaka, *J. Fac. Agric. Hokkaido Univ.*, 1982, **61**, 60-72.
216. T. H. Hsiao, in *The Ecology of Agricultural Pests: Biochemical Approaches*, eds. E. O. C. Symondson and J. E. Liddell, Chapman and Hall, London, UK, 1996, p. 517.
217. T. Matsumoto, M. Yanagiya, S. Maeno and S. Yasuda, *Tetrahedron Lett.*, 1968, **60**, 6297-6300.
218. R. L. L. Kellner and K. Dettner, *Oecologia*, 1996, **107**, 293-300.
219. R. L. Kellner, *Entomol. Exp. Appl.*, 1999, **93**.
220. R. L. Kellner, *J. Insect Physiol.*, 2001, **47**, 475-483.
221. R. L. L. Kellner, *Chemoecology*, 2001, **11**, 127-130.

222. R. L. L. Kellner, *Insect Biochem. Mol. Biol.*, 2002, **32**, 389-395.
223. J. Piel, I. Hofer and D. Hui, *J. Bacteriol.*, 2004, **186**, 1280-1286.
224. Z. Liu, X. Wu, J. Wang and F. Huang, *Agric. Sci. China*, 2009, **8**, 1339-1350.
225. H. Thoetkiattikul, M. H. Beck and M. R. Strand, *Proc. Natl. Acad. Sci. U. S. A.*, 2005, **102**, 11426-11431.
226. N. E. Beckage and J.-M. Drezen, *Parasitoid viruses: symbionts and pathogens*, Academic Press, San Diego, CA, USA, 2012.
227. M. R. Strand and G. R. Burke, *PLoS Pathog.*, 2012, **8**, e1002757.
228. C. R. Currie, J. A. Scott, R. C. Summerbell and D. Malloch, *Nature*, 1999, **398**, 701-704.
229. C. R. Currie and A. E. Stuart, *Proc. R. Soc. Biol. Sci. Ser. B*, 2001, **268**, 1033-1039.
230. C. R. Currie, M. Poulsen, J. Mendenhall, J. J. Boomsma and J. Billen, *Science*, 2006, **311**, 81-83.
231. N. M. Gerardo, S. R. Jacobs, C. R. Currie and U. G. Mueller, *PLoS Biol.*, 2006, **4**, 1358-1363.
232. D. C. Oh, M. Poulsen, C. R. Currie and J. Clardy, *Nat. Chem. Biol.*, 2009, **5**, 391-393.
233. R. Sen, H. D. Ishak, D. Estrada, S. E. Dowd, E. Hong and U. G. Mueller, *Proc. Natl. Acad. Sci. U. S. A.*, 2009, **106**, 17805-17810.
234. M. J. Cafaro, M. Poulsen, A. E. F. Little, S. L. Price, N. M. Gerardo, B. Wong, A. E. Stuart, B. Larget, P. Abbot and C. R. Currie, *Proc. R. Soc. Biol. Sci. Ser. B*, 2011, **278**, 1814-1822.
235. I. Schoenian, M. Spiteller, M. Ghaste, R. Wirth, H. Herz and D. Spiteller, *Proc. Natl. Acad. Sci. U. S. A.*, 2011, **108**, 1955-1960.
236. G. Carr, E. R. Derbyshire, E. Caldera, C. R. Currie and J. Clardy, *J. Nat. Prod.*, 2012, **75**, 1806-1809.
237. C. Kost, T. Lakatos, I. Bottcher, W. R. Arendholz, M. Redenbach and R. Wirth, *Naturwissenschaften*, 2007, **94**, 821-828.
238. S. Haeder, R. Wirth, H. Herz and D. Spiteller, *Proc. Natl. Acad. Sci. U. S. A.*, 2009, **106**, 4742-4746.
239. J. Barke, R. F. Seipke, S. Gruschow, D. Heavens, N. Drou, M. J. Bibb, R. J. Goss, D. W. Yu and M. I. Hutchings, *BMC Biol.*, 2010, **8**, 10.
240. T. D. Zucchi, A. S. Guidolin and F. L. Consoli, *Microbiol. Res.*, 2011, **166**, 68-76.
241. R. F. Seipke, M. Kaltenpoth and M. I. Hutchings, *FEMS Microbiol. Rev.*, 2011, **36**, 862-876.
242. S. C. Carreiro, F. C. Pagnocca, M. Bacci, O. C. Bueno, M. J. A. Hebling and W. J. Middelhoven, *Folia Microbiol.*, 2002, **47**, 259-262.
243. A. Rodrigues, R. Cable, U. Mueller, M. Bacci, Jr. and F. Pagnocca, *Antonie Van Leeuwenhoek*, 2009, **96**, 331-342.
244. A. Hervey and M. S. R. Nair, *Mycologia*, 1979, **71**, 1064-1066.
245. Y. Wang, U. Mueller and J. Clardy, *J. Chem. Ecol.*, 1999, **25**, 935-941.
246. S. A. Van Bael, H. Fernandez-Marin, M. C. Valencia, E. I. Rojas, W. T. Wcislo and E. A. Herre, *Proc. R. Soc. Biol. Sci. Ser. B*, 2009, **276**, 2419-2426.
247. M. Kaltenpoth, W. Gottler, G. Herzner and E. Strohm, *Curr. Biol.*, 2005, **15**, 475-479.
248. M. Kaltenpoth, *Trends Microbiol.*, 2009, **17**, 529-535.
249. J. Kroiss, M. Kaltenpoth, B. Schneider, M.-G. G. Schwinger, C. Hertweck, R. K. Maddula, E. Strohm and A. Svatos, *Nat. Chem. Biol.*, 2010, **6**, 261-263.
250. S. Koehler, J. Doubsky and M. Kaltenpoth, *Front. Zool.*, 2013, **10**, 13.
251. S. Koehler and M. Kaltenpoth, *J. Chem. Ecol.*, 2013, **39**, 978-988.
252. M. Gilliam, S. Taber lli, B. J. Lorenz and D. B. Prest, *J. Invertebr. Pathol.*, 1988, **52**, 314-325.
253. M. Gilliam, *FEMS Microbiol. Lett.*, 1997, **155**, 1-10.
254. D. L. Cox-Foster, S. Conlan, E. C. Holmes, G. Palacios, J. D. Evans, N. A. Moran, P.-L. L. Quan, T. Briese, M. Hornig, D. M. Geiser, V. Martinson, D. vanEngelsdorp, A. L. Kalkstein, A. Drysdale, J. Hui, J. Zhai, L. Cui, S. K. Hutchison, J. F. Simons, M. Egholm, J. S. Pettis and W. I. Lipkin, *Science*, 2007, **318**, 283-287.
255. E. Forsgren, T. C. Olofsson, A. Vásquez and I. Fries, *Apidologie*, 2010, **41**, 99-108.
256. V. G. Martinson, J. Moy and N. A. Moran, *Appl. Environ. Microbiol.*, 2012, **78**, 2830-2840.
257. N. A. Moran, A. K. Hansen, J. E. Powell and Z. L. Sabree, *PLoS One*, 2012, **7**, e36393.
258. A. Vásquez, E. Forsgren, I. Fries, R. J. Paxton, E. Flaberg, L. Szekely and T. C. Olofsson, *PLoS One*, 2012, **7**, e33188.
259. T. C. Olofsson, E. Butler, P. Markowicz, C. Lindholm, L. Larsson and A. Vásquez, *Int. Wound J.*, 2014.
260. R. J. Cano, M. K. Borucki, M. Higby-Schweitzer, H. N. Poinar, G. O. Poinar and K. J. Pollard, *Appl. Environ. Microbiol.*, 1994, **60**, 2164-2167.
261. R. J. Cano and M. K. Borucki, *Science*, 1995, **268**, 1060-1064.
262. H. Koch and P. Schmid-Hempel, *Proc. Natl. Acad. Sci. U. S. A.*, 2011, **108**, 19288-19292.
263. H. Koch and P. Schmid-Hempel, *Microb. Ecol.*, 2011, **62**, 121-133.
264. V. G. Martinson, B. N. Danforth, R. L. Minckley, O. Rueppell, S. Tingek and N. A. Moran, *Mol. Ecol.*, 2011, **20**, 619-628.
265. W. K. Kwong and N. A. Moran, *Int. J. Syst. Evol. Microbiol.*, 2013, **63**, 2008-2018.
266. D. P. Cariveau, J. Elijah Powell, H. Koch, R. Winfree and N. A. Moran, *ISME J.*, 2014, **8**, 2369-2379.
267. W. K. Kwong, P. Engel, H. Koch and N. A. Moran, *Proc. Natl. Acad. Sci. U. S. A.*, 2014, **111**, 11509-11514.
268. V. G. Martinson, T. Magoc, H. Koch, S. L. Salzberg and N. A. Moran, *Appl. Environ. Microbiol.*, 2014, **80**, 3793-3803.
269. X. Pan, G. Zhou, J. Wu, G. Bian, P. Lu, A. S. Raikhel and Z. Xi, *Proc. Natl. Acad. Sci. U. S. A.*, 2012, **109**, E23-E31.
270. E. Rances, H. Y. Yixin, M. Woolfit and E. A. McGraw, *PLoS Pathog.*, 2012, **8**, e1002548.
271. R. L. Glaser and M. A. Meola, *PLoS One*, 2010, **5**, e11977.
272. L. M. Hedges, J. C. Brownlie, S. L. O'Neill and K. N. Johnson, *Science*, 2008, **332**, 702-702.
273. L. Teixeira, Á. Ferreira and M. Ashburner, *PLoS Biol.*, 2008, **6**, e1000002.
274. J. Jaenike, R. Unckless, S. N. Cockburn, L. M. Boelio and S. J. Perlman, *Science*, 2010, **329**, 212-215.
275. J. Xie, I. Vilchez and M. Mateos, *PLoS One*, 2010, **5**, e12149.
276. M. Rohlf and L. Kurschner, *J. Appl. Entomol.*, 2010, **134**, 667-671.
277. P. T. Hamilton, J. S. Leong, B. F. Koop and S. J. Perlman, *Mol. Ecol.*, 2014, **23**, 1558-1570.

278. K. Lam, K. Thu, M. Tsang, M. Moore and G. Gries, *Naturwissenschaften*, 2009, **96**, 1127-1132.
279. E. Ringø, U. Schillinger and W. Holzapfel, in *Biology of Growing Animals*, eds. W. H. Holzapfel and P. J. Naughton, Elsevier, Edinburgh, UK, 2005, pp. 416-453.
280. F. J. Gatesoupe, *J. Mol. Microbiol. Biotechnol.*, 2008, **14**, 107-114.
281. E. Ringø, L. Løvmo, M. Kristiansen and Y. Bakken, *Aquac. Res.*, 2010, **41**, 451-467.
282. S. Ghosh, E. Ringø, A. D. G. Selvam, M. Rahinam, N. Sathyan, N. John and A. A. M. Hatha, *Int. J. Aqua.*, 2014, **4**, 1-11.
283. F. A. Fuhrman, *Ann. N. Y. Acad. Sci.*, 1986, **479**, 1-14.
284. C. T. Hanifin, E. D. Brodie and E. D. Brodie, *Toxicon*, 2002, **40**, 1149-1153.
285. O. R. Pires, A. Sebben, E. F. Schwartz, S. W. Largura, C. Bloch, R. A. Morales and C. A. Schwartz, *Toxicon*, 2002, **40**, 761-766.
286. B. L. Cardall, E. D. Brodie, E. D. Brodie and C. T. Hanifin, *Toxicon*, 2004, **44**, 933-938.
287. E. M. Lehman, E. D. Brodie and E. D. Brodie, *Toxicon*, 2004, **44**, 243-249.
288. C. T. Hanifin, *Mar. Drugs.*, 2010, **8**, 577-593.
289. R. Brucker, M. , C. M. Baylor, R. L. Walters, A. Lauer, R. N. Harris and K. P. C. Minbiole, *J. Chem. Ecol.*, 2008, **34**, 39-43.
290. R. M. Brucker, R. N. Harris, C. R. Schwantes, T. N. Gallaher, D. C. Flaherty, B. A. Lam and K. P. C. Minbiole, *J. Chem. Ecol.*, 2008, **34**, 1422-1429.
291. M. H. Becker, R. M. Brucker, C. R. Schwantes, R. N. Harris and K. P. Minbiole, *Appl. Environ. Microbiol.*, 2009, **75**, 6635-6638.
292. P. J. Wiggins, J. M. Smith, R. N. Harris and K. P. C. Minbiole, *J. Herpetol.*, 2011, **45**, 329-332.
293. A. H. Loudon, J. A. Holland, T. P. Umile, E. A. Burzynski, K. P. Minbiole and R. N. Harris, *Front. Microbiol.*, 2014, **5**, e00441
294. R. N. Harris, R. M. Brucker, J. B. Walke, M. H. Becker, C. R. Schwantes, D. C. Flaherty, B. A. Lam, D. C. Woodhams, C. J. Briggs, V. T. Vredenburg and K. P. C. Minbiole, *ISME J.*, 2009, **3**, 818-824.
295. J. M. Myers, J. P. Ramsey, A. L. Blackman, A. E. Nichols, K. P. C. Minbiole and R. N. Harris, *J. Chem. Ecol.*, 2012, **38**, 958-965.
296. A. M. Martín-Platero, E. Valdivia, M. Ruiz-Rodriguez, J. J. Soler, M. Martín-Vivaldi, M. Maqueda and M. Martínez-Bueno, *Appl. Environ. Microbiol.*, 2006, **72**, 4245-4249.
297. J. J. Soler, M. Martín-Vivaldi, M. Ruiz-Rodriguez, E. Valdivia, A. M. Martín-Platero, M. Martínez-Bueno, J. M. Peralta-Sanchez and M. Méndez, *Funct. Ecol.*, 2008, **22**, 864,871.
298. M. Ruiz-Rodriguez, E. Valdivia, J. J. Soler, M. Martín-Vivaldi, A. M. Martín-Platero and M. Martínez-Bueno, *J. Exp. Biol.*, 2009, **212**, 3621-3626.
299. M. Martín-Vivaldi, A. Pena, J. M. Peralta-Sanchez, L. Sanchez, S. Ananou, M. Ruiz-Rodriguez and J. J. Soler, *Proc. R. Soc. Biol. Sci. Ser. B*, 2010, **277**, 123-130.
300. M. Ruiz-Rodriguez, M. Martínez-Bueno, M. Martín-Vivaldi, E. Valdivia and J. J. Soler, *FEMS Microbiol. Ecol.*, 2013, **85**, 495-502.
301. M. Martín-Vivaldi, J. J. Soler, J. M. Peralta-Sánchez, L. Arco, A. M. Martín-Platero, M. Martínez-Bueno, M. Ruiz-Rodríguez and E. Valdivia, *J. Anim. Ecol.*, 2014, **83**, 1289-1301.
302. M. Otto, R. Süßmuth, C. Vuong, G. Jung and F. Götz, *FEBS Lett.*, 1999, **450**, 257-262.
303. A. L. Cogen, K. Yamasaki, J. Muto, K. Sanchez, M., L. C. Alexander, J. Tanios, Y. Lai, J. E. Kim, V. Nizet and R. L. Gallo, *PLoS One*, 2010, **5**, e8557.
304. A. L. Cogen, K. Yamasaki, K. M. Sanchez, R. A. Dorschner, Y. Lai, D. T. MacLeod, J. W. Torpey, M. Otto, V. Nizet, J. E. Kim and R. L. Gallo, *J. Invest. Dermatol.*, 2010, **130**, 192-200.
305. T. Iwase, Y. Uehara, H. Shinji, A. Tajima, H. Seo, K. Takada, T. Agata and Y. Mizunoe, *Nature*, 2010, **465**, 346-349.
306. R. L. Gallo and T. Nakatsuji, *J. Invest. Dermatol.*, 2011, **131**, 1974-1980.
307. S. K. Mazmanian, J. L. Round and D. L. Kasper, *Nature*, 2008, **453**, 620-625.
308. E. S. Barton, D. W. White, J. S. Cathelyn, K. A. Brett-McClellan, M. Engle, M. S. Diamond, V. L. Miller and H. W. Virgin, *Nature*, 2007, **447**, 326-329.
